# Supplementary material for: Ruthenium nanoparticles stabilized by 1,2,3-triazolylidene ligands in the hydrogen isotope exchange of E–H bonds (E = B, Si, Ge, Sn) using deuterium gas
Source: Royal Society of Chemistry journal article supplement (doi:10.1039/d3nr02637j), 2023-01-01
Supplement: d3nr02637j1.pdf [file d3nr02637j1.pdf]

**Ruthenium nanoparticles stabilized by 1,2,3-triazolylidene ligands in the hydrogen isotope exchange of E-H bonds (E = B, Si, Ge, Sn) using deuterium gas**

Pablo Molinillo,<sup>a</sup> Maxime Puyo,<sup>a</sup> Florencia Vattier,<sup>b</sup> Bertrand Lacroix,<sup>c</sup> Nuria Rendón,<sup>a,\*</sup> Patricia Lara<sup>a,\*</sup> and Andrés Suárez<sup>a,\*</sup>

<sup>a</sup> *Instituto de Investigaciones Químicas (IIQ), Departamento de Química Inorgánica, and Centro de Innovación en Química Avanzada (ORFEO-CINQA). CSIC and Universidad de Sevilla. Avda. Américo Vespucio, 49, 41092 Sevilla, Spain.*

<sup>b</sup> *Instituto de Ciencia de Materiales de Sevilla. CSIC-Universidad de Sevilla. Avda. Américo Vespucio 49, 41092 Sevilla, Spain.*

<sup>c</sup> *Departamento de Física Aplicada I, Escuela Politécnica Superior, Universidad de Sevilla, C/ Virgen de África 7, 41011 Sevilla, Spain.*

E-mails: nuria@iiq.csic.es; patricia@iiq.csic.es; andres.suarez@iiq.csic.es

**Table of contents:**

**S1. General procedures, materials and characterization techniques.**

**S2. Synthesis of 1,2,3-triazolylidene ligands precursors.**

**S3. TEM and HRTEM images.**

**S4. XPS spectra.**

**S5. NMR data of deuterated products.**

**S6. References.**

## S1. General procedures, materials and characterization techniques.

Liquid phase  $^1\text{H}$  and  $^2\text{H}$  NMR spectra were recorded on a Bruker DRX-400 spectrometer. Spectra were referenced to  $\text{SiMe}_4$  ( $\delta = 0$  ppm) using the residual proton solvent peaks as internal standards. All NMR spectra were recorded at  $25^\circ\text{C}$ .

HRMS experiments were carried out in a Thermo Scientific-QExactive apparatus by the Mass Spectrometry Service of the Centro de Investigación, Tecnología e Innovación – CITIUS (University of Sevilla).

## S2. Synthesis of 1,2,3-triazolylidene ligands precursors.

### MIC1 precursor

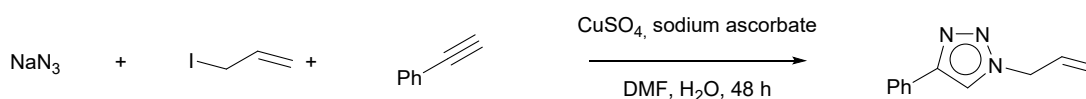

In a round-bottom flask, copper sulphate (0.250 g, 1.1 mmol), sodium ascorbate (0.210 g, 1.1 mmol) and sodium azide (0.806 g, 12.4 mmol) were dissolved in DMF (8 mL) and water (5 mL). Phenylacetylene (1.1 mL, 10 mmol) and allyl iodide (1.64 g, 9.8 mmol) were added, and the reaction mixture was stirred under  $\text{N}_2$  for 48 h. After that time, the reaction was quenched using 100 mL of an aqueous basic solution (0.6%  $\text{NH}_4\text{OH}$ ), producing the precipitation of a solid. The precipitate was filtered, washed with water (3 x 30 mL), and dried. White solid (1.30 g, 70%). Spectroscopic data for this product agree to those previously reported in the literature.<sup>1</sup>

$^1\text{H}$  NMR (400 MHz,  $\text{CD}_2\text{Cl}_2$ ):  $\delta$  7.87 (m, 2H, 2  $\text{H}_{\text{Ph}}$ ), 7.84 (s, 1H,  $\text{H}_{\text{triazole}}$ ), 7.56-7.32 (m, 3H, 3  $\text{H}_{\text{Ph}}$ ), 6.11 (m, 1H,  $\text{CH}=\text{CH}_2$ ), 5.38 (m, 2H,  $=\text{CH}_2$ ), 5.03 (d,  $^3J_{\text{HH}} = 6.3$  Hz, 2H,  $\text{CH}_2$ ).

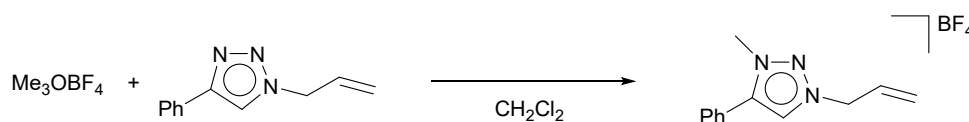

1-allyl-4-phenyl-1H-1,2,3-triazole (0.120 g, 0.65 mmol) was dissolved in  $\text{CH}_2\text{Cl}_2$  (10 mL). The resulting solution was cooled to  $0^\circ\text{C}$ , and added to  $\text{Me}_3\text{OBF}_4$  (0.252 g, 0.85 mmol). The mixture was allowed to reach room temperature, and stirred for 72 h. The solvent was evaporated under vacuum, and MeOH (10 mL) was added producing the formation of a precipitate. The solid was filtered off, and the solution was evaporated to dryness. The residue was washed with diethyl ether (3 x 10 mL) to yield a white solid (0.091 g, 45%). Spectroscopic data for this product agree to those previously reported in the literature.<sup>1</sup>

$^1\text{H}$  NMR (400 MHz,  $\text{CD}_2\text{Cl}_2$ ):  $\delta$  8.53 (s, 1H,  $\text{H}_{\text{triazolium}}$ ), 7.65 (m, 5H, 5  $\text{H}_{\text{Ph}}$ ), 6.19 (m, 1H,  $\text{CH}=\text{CH}_2$ ), 5.66 (d,  $^3J_{\text{HH}} = 17.1$  Hz, 1H,  $=\text{CHH}$ ), 5.58 (d,  $^3J_{\text{HH}} = 10.2$  Hz, 1H,  $=\text{CHH}$ ), 5.26 (d,  $^3J_{\text{HH}} = 6.7$  Hz, 2H,  $\text{CH}_2$ ), 4.28 (s, 3H,  $\text{CH}_3$ ).

$^{13}\text{C}\{^1\text{H}\}$  NMR (101 MHz,  $\text{CD}_2\text{Cl}_2$ ):  $\delta$  143.6, 131.9, 129.7, 129.3, 128.3, 128.1, 124.0, 121.9, 56.2, 38.5.

HRMS (ESI, positive mode):  $m/z$  200.1182 [ $M^+$ ], exact mass calculated for  $C_{12}H_{14}N_3$ : 200.1178.

HRMS (ESI, negative mode):  $m/z$  87.0035 [ $M^-$ ]; exact mass calculated for  $BF_4$ : 87.0034.

### MIC2 precursor

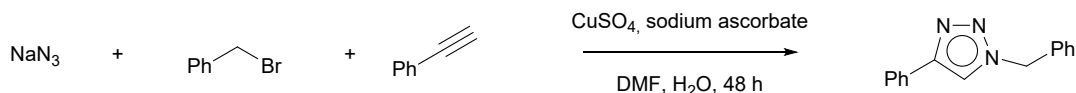

In a round-bottom flask, copper sulphate (0.250 g, 1.1 mmol), sodium ascorbate (0.210 g, 1.1 mmol) and sodium azide (0.806 g, 12.4 mmol) were dissolved in DMF (8 mL) and water (5 mL). Phenylacetylene (1.1 mL, 10 mmol) and benzyl bromide (1.67 g, 9.8 mmol) were added and the reaction mixture was stirred under  $N_2$  for 48 h. After that time, the reaction was quenched using 100 mL of an aqueous basic solution (0.6%  $NH_4OH$ ), producing the precipitation of a solid. The precipitate was filtered, washed with water (3 x 30 mL), and dried. Pale white solid (1.10 g, 46%). Spectroscopic data for this product agree to those previously reported in the literature.<sup>2</sup>

$^1H$  NMR (400 MHz,  $CD_2Cl_2$ ):  $\delta$  7.79 (m, 2H, 2  $H_{Ph}$ ), 7.74 (s, 1H,  $H_{triazole}$ ), 7.44-7.28 (m, 8H, 8  $H_{Ph}$ ), 5.56 (s, 2H,  $CH_2$ ).

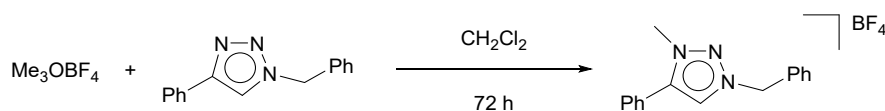

1-benzyl-4-phenyl-1H-1,2,3-triazole (0.150 g, 0.65 mmol) was dissolved in  $CH_2Cl_2$  (10 mL). The resulting solution was cooled to 0 °C, and added to  $Me_3OBF_4$  (0.250 g, 0.85 mmol). The mixture was allowed to reach room temperature, and stirred for 72 h. The solvent was evaporated under vacuum, and MeOH (10 mL) was added producing the formation of a precipitate. The solid was filtered off, and the solution was evaporated to dryness. The residue was washed with diethyl ether (3 x 10 mL) to yield a white solid (0.120 g, 55%). Spectroscopic data for this product agree to those previously reported in the literature.<sup>3</sup>

$^1H$  NMR (400 MHz,  $CD_2Cl_2$ ):  $\delta$  8.53 (s, 1H,  $H_{triazolium}$ ), 7.57 (m, 10H, 10  $H_{Ph}$ ), 5.86 (s, 2H,  $CH_2$ ), 4.28 (s, 3H,  $CH_3$ ).

$^{13}C\{^1H\}$  NMR (101 MHz,  $CD_2Cl_2$ ):  $\delta$  143.6, 132.0, 131.3, 129.9, 129.7, 129.6, 129.4, 129.2, 128.3, 121.8, 57.6, 38.6.

HRMS (ESI, positive mode):  $m/z$  250.1338 [ $M^+$ ], exact mass calculated for  $C_{16}H_{16}N_3$ : 250.1337.

HRMS (ESI, negative mode):  $m/z$  87.0035 [ $M^-$ ]; exact mass calculated for  $BF_4$ : 87.0034.

### MIC3 precursor

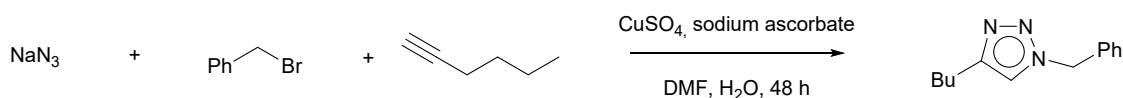

In a round-bottom flask, copper sulphate (0.250 g, 1.1 mmol), sodium ascorbate (0.210 g, 1.1 mmol) and sodium azide (0.806 g, 12.4 mmol) were dissolved in DMF (8 mL) and water (5 mL).

1-Hexyne (1.1 mL, 10.0 mmol) and benzyl bromide (1.67 g, 9.8 mmol) were added and the reaction mixture was stirred under N<sub>2</sub> for 48 h. After that time, the reaction was quenched using 100 mL of an aqueous basic solution (0.6% NH<sub>4</sub>OH), producing the precipitation of a solid. The precipitate was filtered, washed with water (3 x 30 mL), and dried. White solid (1.30 g, 60%). Spectroscopic data for this product agree to those previously reported in the literature.<sup>1</sup>

<sup>1</sup>H NMR (400 MHz, CD<sub>3</sub>OD): δ 7.36 (m, 2H, 2 H<sub>Ph</sub>), 7.31 (s, 1H, H<sub>triazole</sub>), 7.25 (m, 3H, 3 H<sub>Ph</sub>), 5.78 (s, 2H, CH<sub>2</sub>), 2.66 (t, <sup>3</sup>J<sub>HH</sub> = 7.2 Hz, 2H, CH<sub>2</sub>), 1.61 (m, 2H, CH<sub>2</sub>), 1.49 (m, 2H, CH<sub>2</sub>), 1.00 (t, <sup>3</sup>J<sub>HH</sub> = 8.2 Hz, 3H, CH<sub>3</sub>).

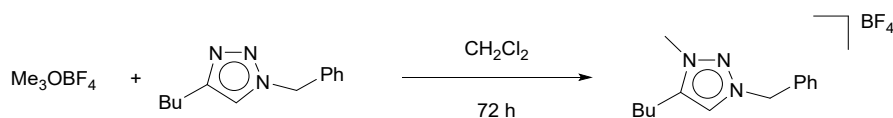

1-benzyl-4-butyl-1H-1,2,3-triazole (0.141 g, 0.65 mmol) was dissolved in CH<sub>2</sub>Cl<sub>2</sub> (10 mL). The resulting solution was cooled to 0 °C, and added to Me<sub>3</sub>OBF<sub>4</sub> (0.250 g, 0.85 mmol). The mixture was allowed to reach room temperature, and stirred for 72 h. The solvent was evaporated under vacuum, and MeOH (10 mL) was added producing the formation of a precipitate. The solid was filtered off, and the solution was evaporated to dryness. The residue was washed with diethyl ether (3 x 10 mL) to yield a white solid (0.112 g, 53%). Spectroscopic data for this product agree to those previously reported in the literature.<sup>1,4</sup>

<sup>1</sup>H NMR (400 MHz, CD<sub>3</sub>OD): δ 8.59 (s, 1H, H<sub>triazolium</sub>), 7.47 (m, 5H, 5 H<sub>Ph</sub>), 5.78 (s, 2H, CH<sub>2</sub>), 4.24 (s, 3H, CH<sub>3</sub>), 2.86 (t, <sup>3</sup>J<sub>HH</sub> = 8.4 Hz, 2H, CH<sub>2</sub>), 1.74 (m, 2H, CH<sub>2</sub>), 1.48 (m, 2H, CH<sub>2</sub>), 1.00 (t, <sup>3</sup>J<sub>HH</sub> = 7.8 Hz, 3H, CH<sub>3</sub>).

<sup>13</sup>C{<sup>1</sup>H} NMR (101 MHz, CD<sub>3</sub>OD): δ 145.2, 132.4, 129.2, 128.9, 128.8, 127.5, 56.6, 36.4, 28.4, 22.4, 21.7, 12.5.

HRMS (ESI, positive mode): *m/z* 230.1648 [M<sup>+</sup>], exact mass calculated for C<sub>14</sub>H<sub>20</sub>N<sub>3</sub>: 230.1652.

HRMS (ESI, negative mode): *m/z* 87.0035 [M<sup>-</sup>]; exact mass calculated for BF<sub>4</sub>: 87.0034.

### S3. TEM and HRTEM images.

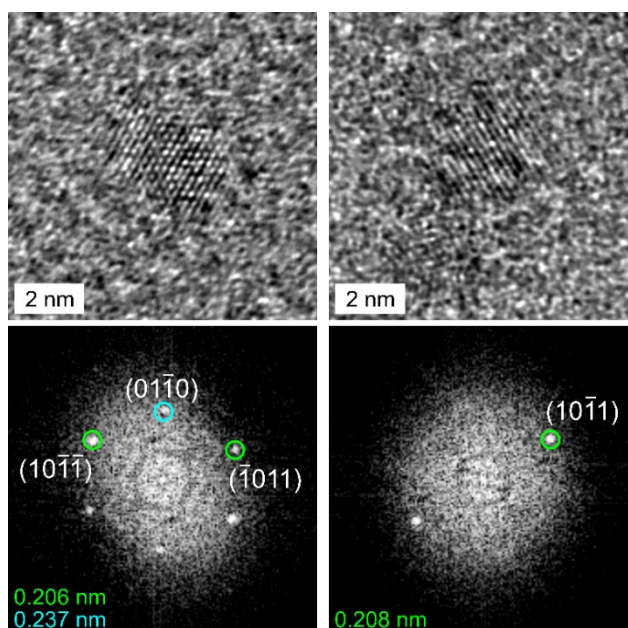

**Figure S1.** HRTEM images of Ru-MIC3<sup>0.2</sup> nanoparticles and their corresponding fast Fourier transform analyses.

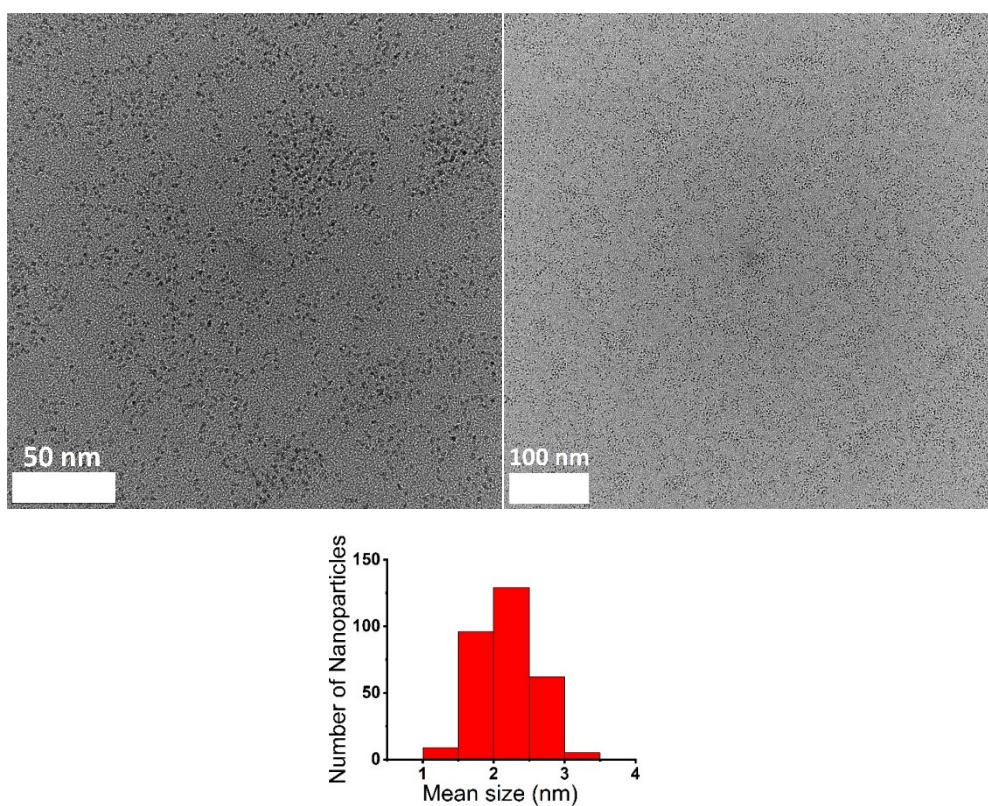

**Figure S2.** TEM images and size distribution histogram of Ru-MIC1<sup>0.2</sup> nanoparticles after the catalytic deuteration of Si-5.

#### S4. XPS spectra.

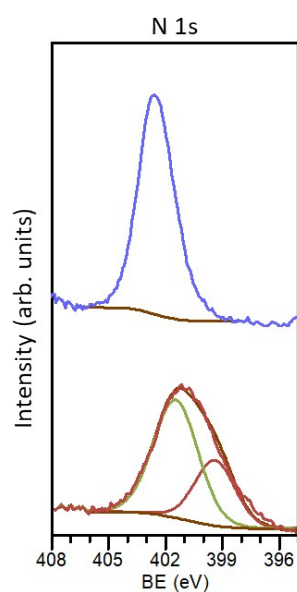

**Figure S3.** High resolution N 1s photoemission region for **MIC2** ligand precursor (top) and **Ru·MIC2<sup>0.2</sup>** nanoparticles (bottom).

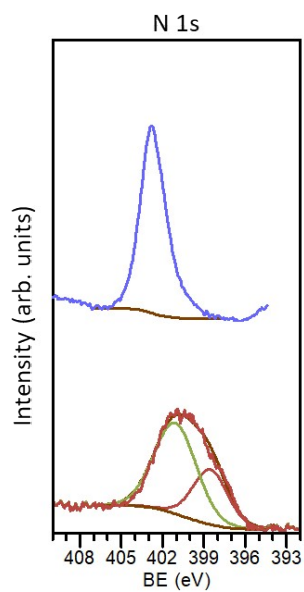

**Figure S4.** High resolution N 1s photoemission region for **MIC3** ligand precursor (top) and **Ru·MIC3<sup>0.2</sup>** nanoparticles (bottom).

## S5. NMR data of deuterated products.

### Me<sub>2</sub>PhSiD (Si-1)

Deuterium incorporation: 96%. Spectroscopic data for this product agree to those previously reported in the literature.<sup>5</sup>

<sup>1</sup>H NMR (400 MHz, CD<sub>2</sub>Cl<sub>2</sub>): δ 7.57 (m, 2H, 2 H arom), 7.37 (m, 3H, 3 H arom), 4.45 (hept, <sup>3</sup>J<sub>HH</sub> = 3.8 Hz, SiH), 0.37 (s, 6H, 2 CH<sub>3</sub>).

<sup>2</sup>H NMR (60 MHz, CH<sub>2</sub>Cl<sub>2</sub>): δ 4.45 (SiD).

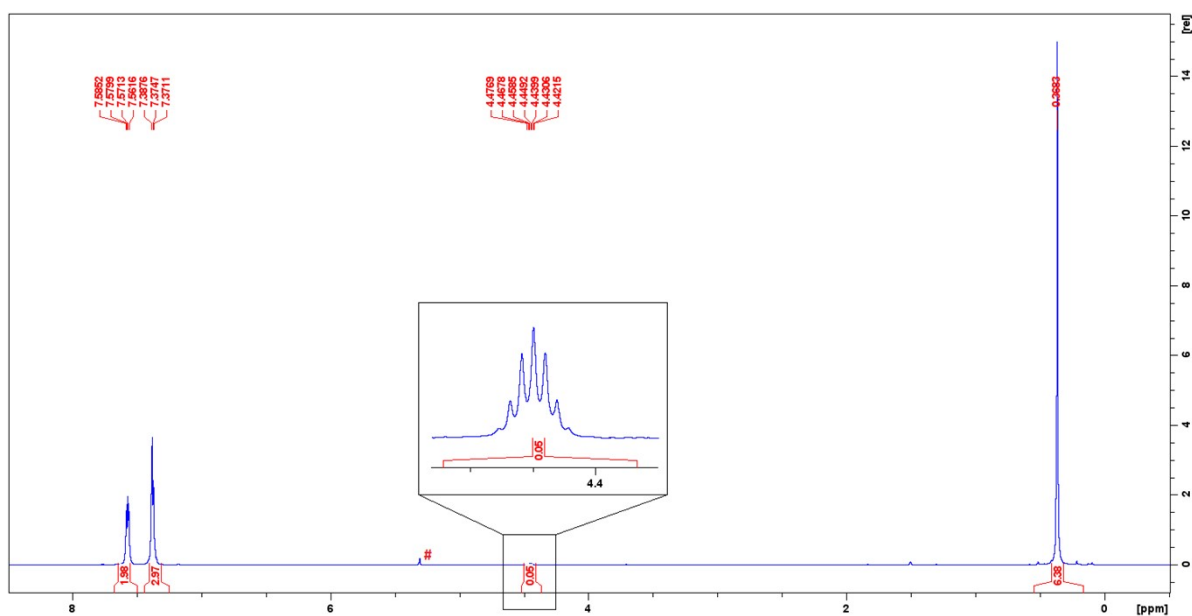

**Figure S5.** <sup>1</sup>H NMR spectrum (CD<sub>2</sub>Cl<sub>2</sub>, 400 MHz) of the H/D exchange in Me<sub>2</sub>PhSiH (**Si-1**). (# denotes residual CH<sub>2</sub>Cl<sub>2</sub> from the deuterated solvent).

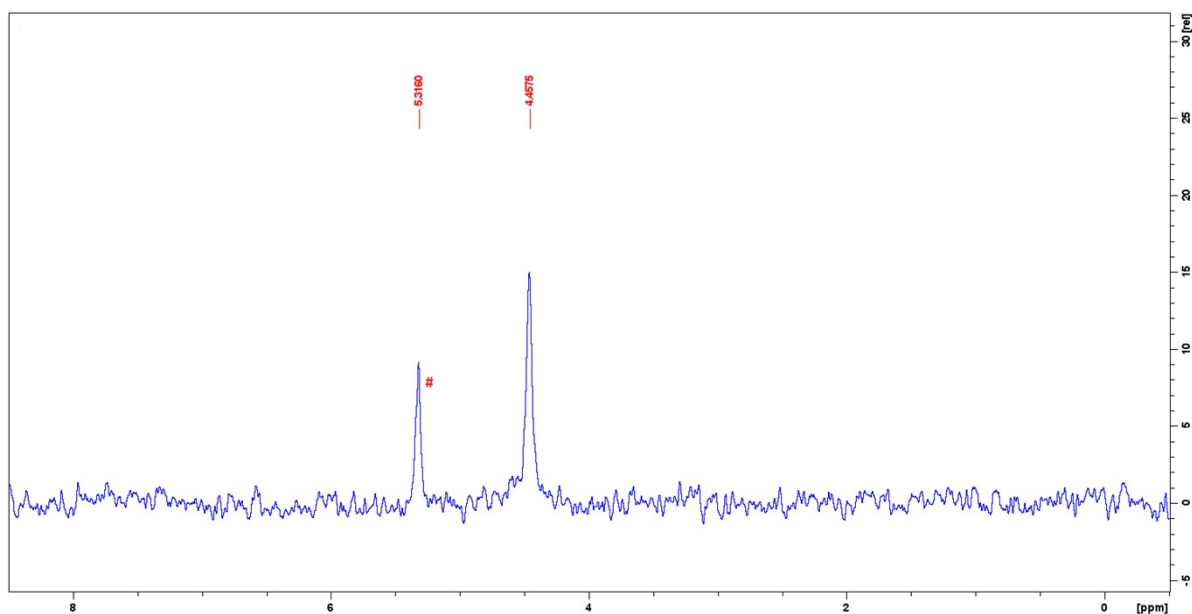

**Figure S6.** <sup>2</sup>H NMR spectrum (CH<sub>2</sub>Cl<sub>2</sub>, 60 MHz) of the H/D exchange in Me<sub>2</sub>PhSiH (**Si-1**). (# denotes CD<sub>2</sub>Cl<sub>2</sub> used as reference).



## MePh<sub>2</sub>SiD (Si-2)

Deuterium incorporation: 85%. Spectroscopic data for this product agree to those previously reported in the literature.<sup>6</sup>

<sup>1</sup>H NMR (400 MHz, CD<sub>2</sub>Cl<sub>2</sub>): δ 7.62 (m, 4H, 4 H arom), 7.42 (m, 6H, 6 H arom), 4.99 (q, <sup>3</sup>J<sub>HH</sub> = 3.8 Hz, SiH), 0.68 (s, 3H, CH<sub>3</sub>).

<sup>2</sup>H NMR (60 MHz, CH<sub>2</sub>Cl<sub>2</sub>): δ 4.99 (SiD).

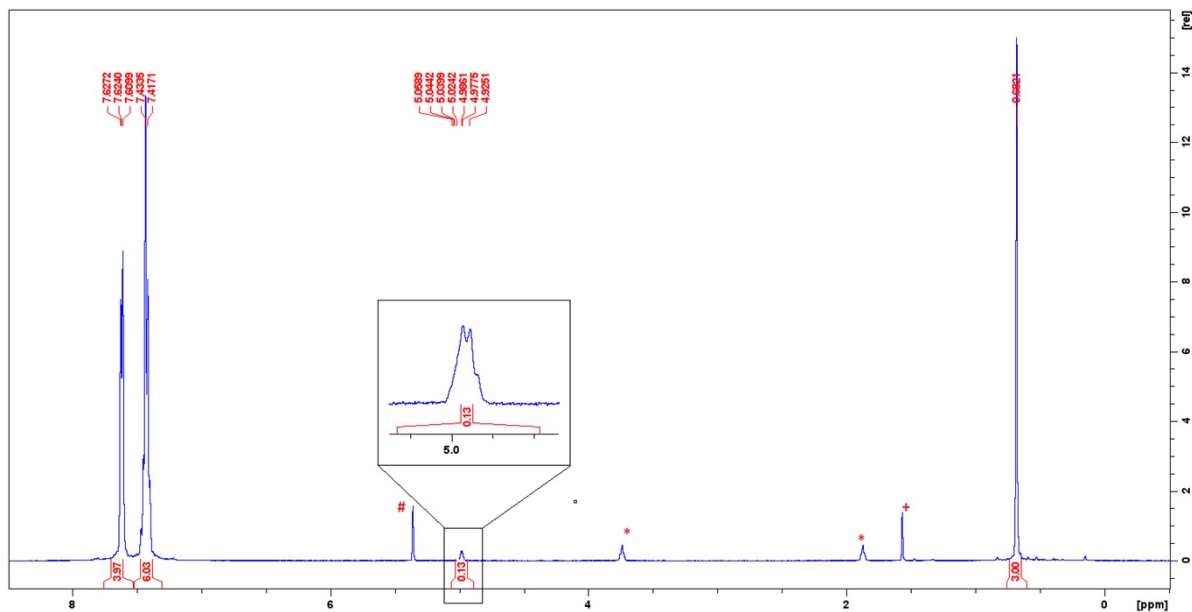

**Figure S7.** <sup>1</sup>H NMR spectrum (CD<sub>2</sub>Cl<sub>2</sub>, 400 MHz) of the H/D exchange in MePh<sub>2</sub>SiH (Si-2). (# denotes residual CH<sub>2</sub>Cl<sub>2</sub> from the deuterated solvent, \* denotes residual THF, + denotes H<sub>2</sub>O).

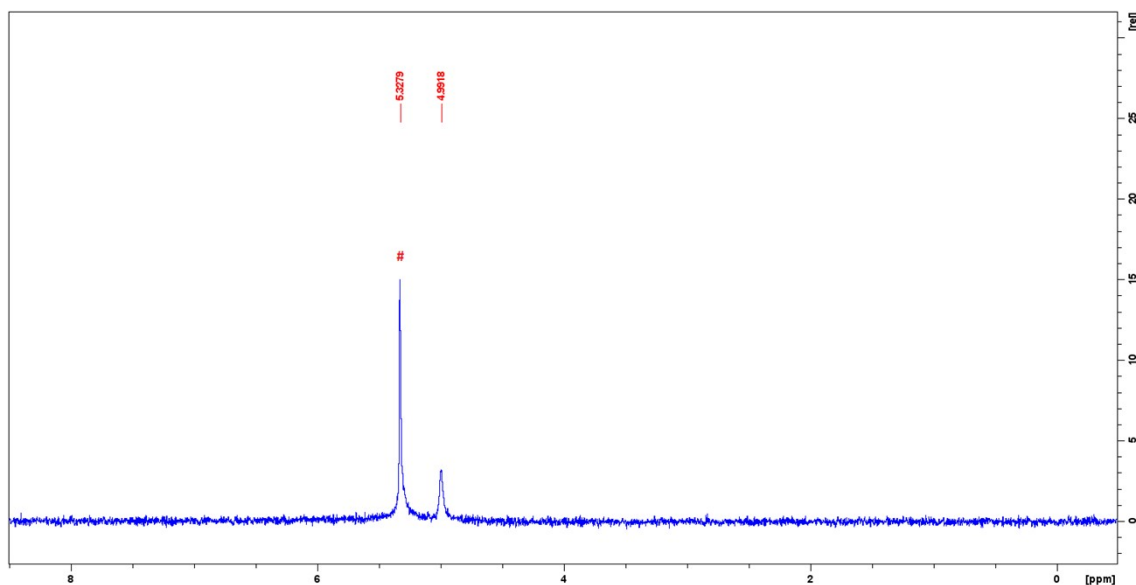

**Figure S8.** <sup>2</sup>H NMR spectrum (CH<sub>2</sub>Cl<sub>2</sub>, 60 MHz) of the H/D exchange in MePh<sub>2</sub>SiH (Si-2). (# denotes CD<sub>2</sub>Cl<sub>2</sub> used as reference).

### Ph<sub>3</sub>SiD (Si-3)

Deuterium incorporation: 91%. Spectroscopic data for this product agree to those previously reported in the literature.<sup>7</sup>

<sup>1</sup>H NMR (400 MHz, CD<sub>2</sub>Cl<sub>2</sub>): δ 7.66 (m, 6H, 6 H arom), 7.46 (m, 9H, 9 H arom), 5.52 (s, SiH).

<sup>2</sup>H NMR (60 MHz, CH<sub>2</sub>Cl<sub>2</sub>): δ 5.53 (SiD).

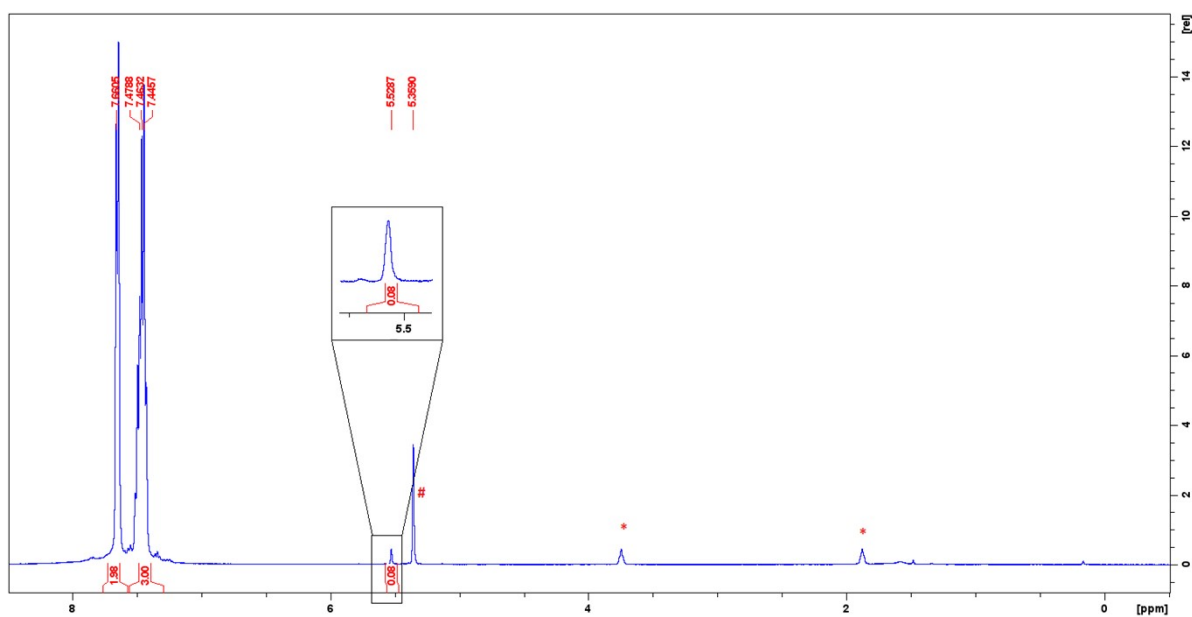

**Figure S9.** <sup>1</sup>H NMR spectrum (CD<sub>2</sub>Cl<sub>2</sub>, 400 MHz) of the H/D exchange in Ph<sub>3</sub>SiH (Si-3). (# denotes residual CH<sub>2</sub>Cl<sub>2</sub> from the deuterated solvent, \* denotes residual THF)

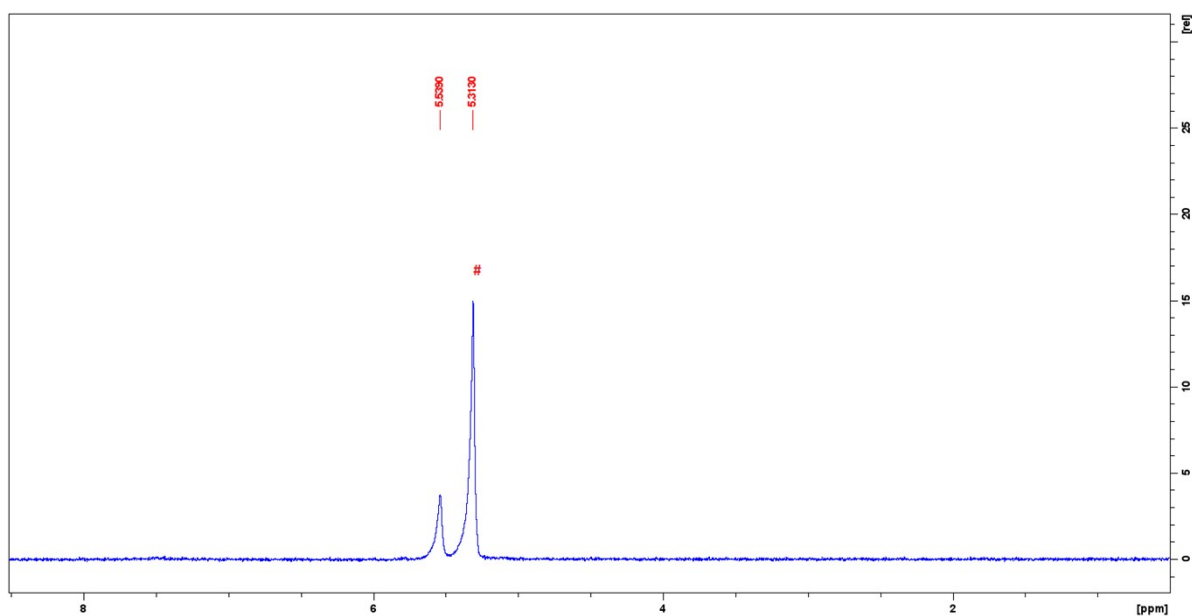

**Figure S10.** <sup>2</sup>H NMR spectrum (CH<sub>2</sub>Cl<sub>2</sub>, 60 MHz) of the H/D exchange in Ph<sub>3</sub>SiH (Si-3). (# denotes CD<sub>2</sub>Cl<sub>2</sub> used as reference).

### <sup>t</sup>BuMe<sub>2</sub>SiD (Si-4)

Deuterium incorporation: 95%. Spectroscopic data for this product agree to those previously reported in the literature.<sup>7</sup>

<sup>1</sup>H NMR (400 MHz, THF-*d*<sub>8</sub>): δ 3.72 (hept, <sup>3</sup>J<sub>HH</sub> = 3.8 Hz, SiH), 0.95 (s, 9H, SiC(CH<sub>3</sub>)<sub>3</sub>), 0.07 (m, 6H, 2 CH<sub>3</sub>).

<sup>2</sup>H NMR (60 MHz, THF-*d*<sub>8</sub>): δ 3.71 (SiD).

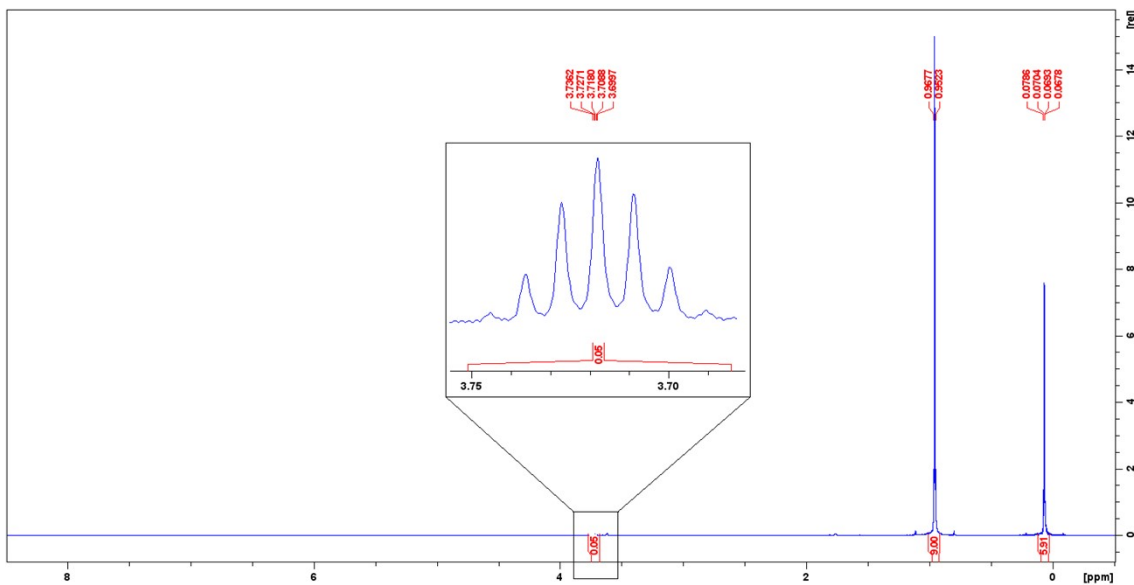

**Figure S11.** <sup>1</sup>H NMR spectrum (THF-*d*<sub>8</sub>, 400 MHz) of the H/D exchange in <sup>t</sup>BuMe<sub>2</sub>SiH (Si-4).

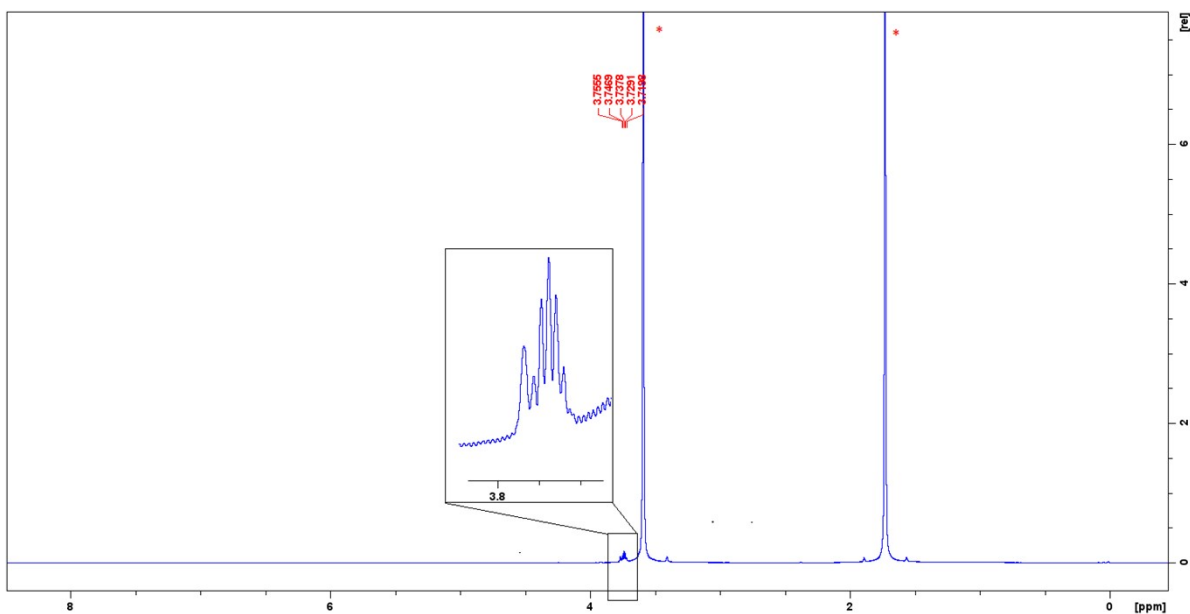

**Figure S12.** <sup>2</sup>H NMR spectrum (THF-*d*<sub>8</sub>, 400 MHz) of the H/D exchange in <sup>t</sup>BuMe<sub>2</sub>SiH (Si-4). (\* denotes residual THF from the deuterated solvent).

### $^n\text{Pr}_3\text{SiD}$ (Si-5)

Deuterium incorporation: 92% (SiD), 5% (SiCD<sub>2</sub>). Spectroscopic data for this product agree to those previously reported in the literature.<sup>8</sup>

<sup>1</sup>H NMR (400 MHz, CD<sub>2</sub>Cl<sub>2</sub>):  $\delta$  3.69 (hept, <sup>3</sup>J<sub>HH</sub> = 3.2 Hz, SiH), 1.40 (m, <sup>3</sup>J<sub>HH</sub> = 7.2 Hz, 6H, 3 CH<sub>2</sub>), 0.96 (t, <sup>3</sup>J<sub>HH</sub> = 7.2 Hz, 9H, 3 CH<sub>3</sub>), 0.60 (t, <sup>3</sup>J<sub>HH</sub> = 8.1 Hz, 6H, 3 SiCH<sub>2</sub>).

<sup>2</sup>H NMR (60 MHz, CH<sub>2</sub>Cl<sub>2</sub>):  $\delta$  3.76 (SiD), 0.63 (SiCD<sub>2</sub>).

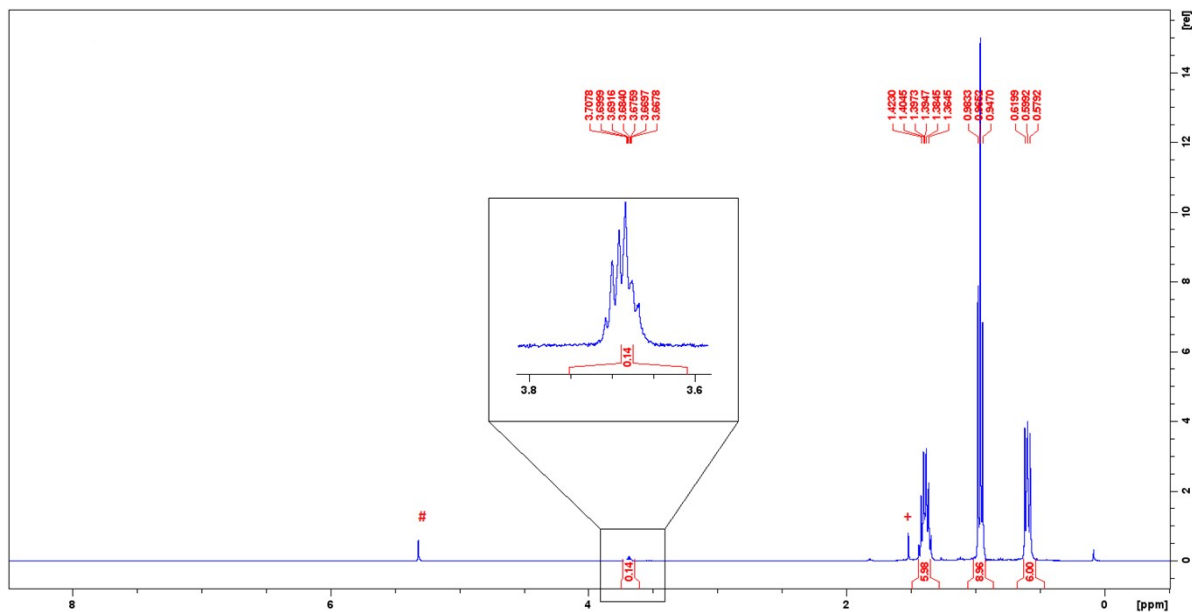

**Figure S13.** <sup>1</sup>H NMR spectrum (CD<sub>2</sub>Cl<sub>2</sub>, 400 MHz) of the H/D exchange in  $^n\text{Pr}_3\text{SiH}$  (Si-5). (# denotes residual CH<sub>2</sub>Cl<sub>2</sub> from the deuterated solvent, + denotes H<sub>2</sub>O).

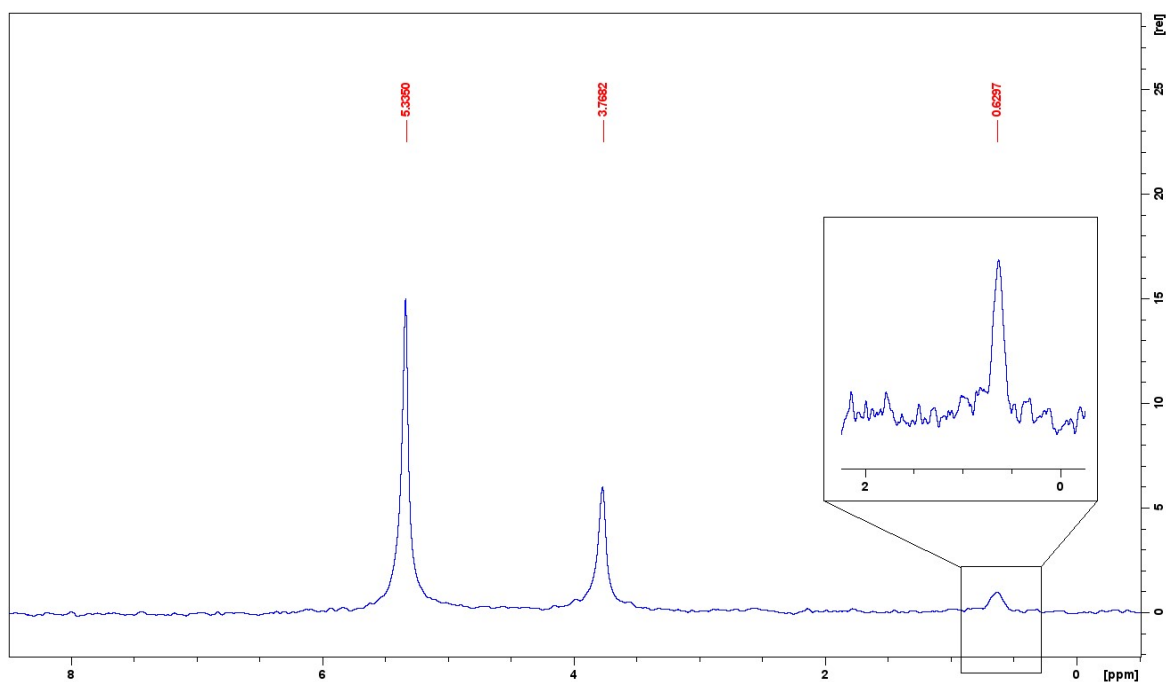

**Figure S14.** <sup>2</sup>H NMR spectrum (CH<sub>2</sub>Cl<sub>2</sub>, 60 MHz) of the H/D exchange in  $^n\text{Pr}_3\text{SiH}$  (Si-5). (# denotes CD<sub>2</sub>Cl<sub>2</sub> used as reference).

### $i\text{Pr}_3\text{SiD}$ (Si-6)

Deuterium incorporation: 94%. Spectroscopic data for this product agree to those previously reported in the literature.<sup>9</sup>

$^1\text{H}$  NMR (400 MHz,  $\text{CD}_2\text{Cl}_2$ ):  $\delta$  3.35 (s, SiH), 1.10 (m, 21H, 3 CH + 6  $\text{CH}_3$ ).

$^2\text{H}$  NMR (60 MHz,  $\text{CH}_2\text{Cl}_2$ ):  $\delta$  3.36 (SiD).

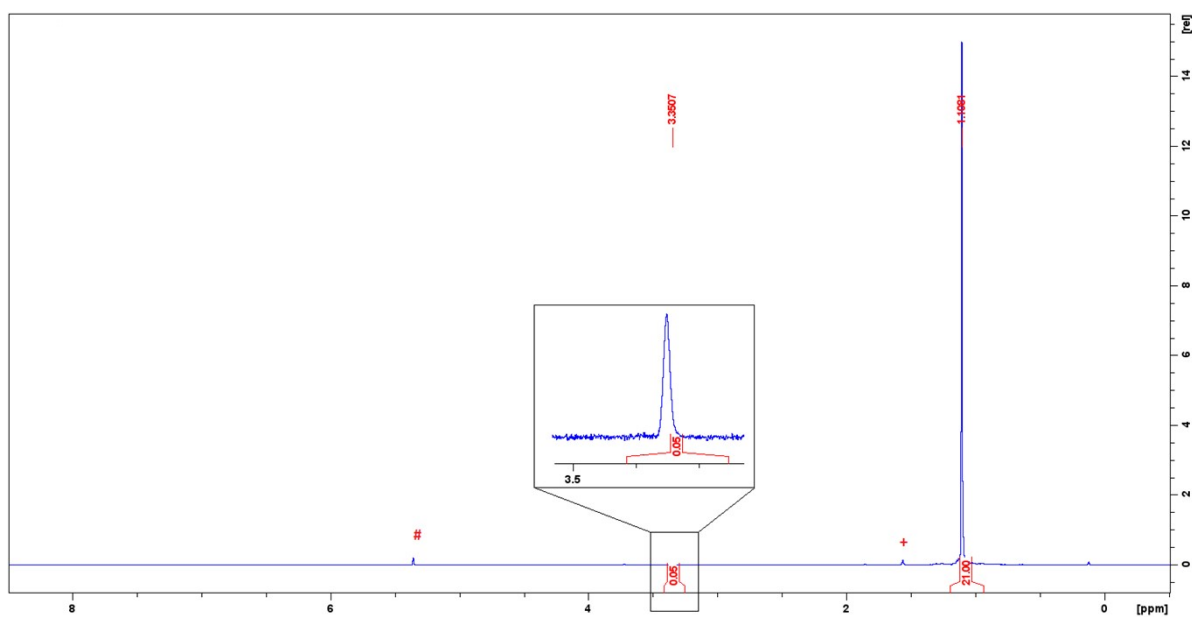

**Figure S15.**  $^1\text{H}$  NMR spectrum ( $\text{CD}_2\text{Cl}_2$ , 400 MHz) of the H/D exchange in  $i\text{Pr}_3\text{SiH}$  (Si-6). (# denotes residual  $\text{CH}_2\text{Cl}_2$  from the deuterated solvent, + denotes  $\text{H}_2\text{O}$ ).

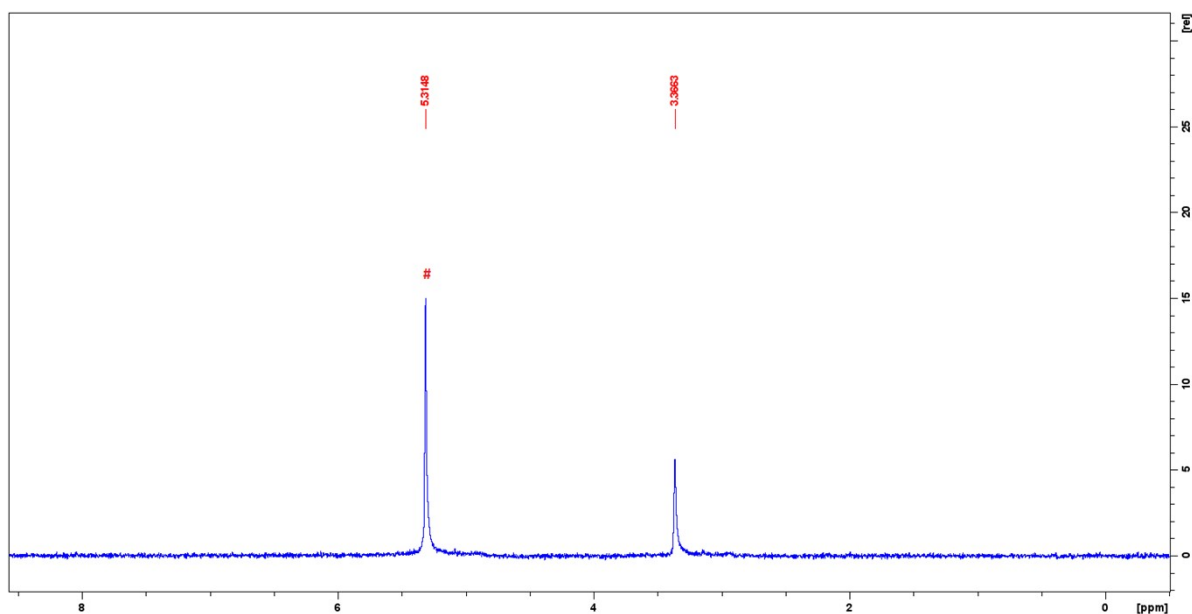

**Figure S16.**  $^2\text{H}$  NMR spectrum ( $\text{CH}_2\text{Cl}_2$ , 60 MHz) of the H/D exchange in  $i\text{Pr}_3\text{SiH}$  (Si-6). (# denotes  $\text{CD}_2\text{Cl}_2$  used as reference).

### (Me)<sub>2</sub>DSiPhSiD(Me)<sub>2</sub> (Si-7)

Deuterium incorporation: 85%. Spectroscopic data for this product agree to those previously reported in the literature.<sup>10</sup>

<sup>1</sup>H NMR (400 MHz, CD<sub>2</sub>Cl<sub>2</sub>): δ 7.63-7.61 (m, 2H, 2 H arom), 7.41-7.38 (m, 2H, 2 H arom), 4.72 (hept, <sup>3</sup>J<sub>HH</sub> = 3.6 Hz, SiH), 0.41 (s, 12H, 4CH<sub>3</sub>).

<sup>2</sup>H NMR (60 MHz, CH<sub>2</sub>Cl<sub>2</sub>): δ 4.82 (s, 1D, SiD).

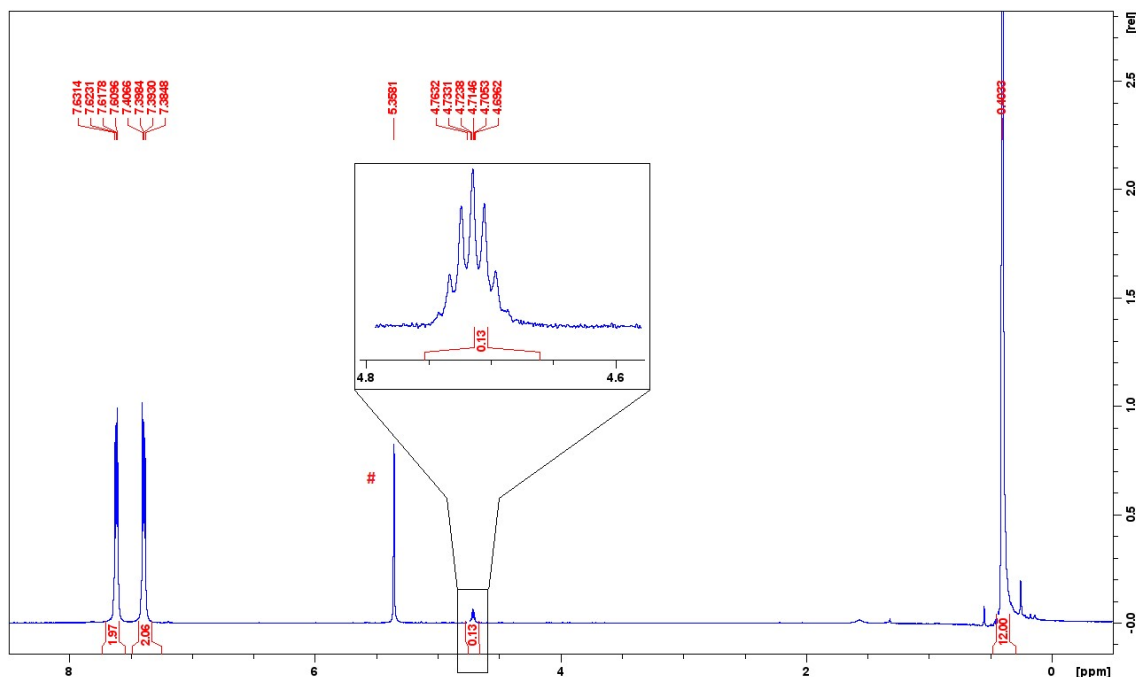

**Figure S17.** <sup>1</sup>H NMR spectrum (CD<sub>2</sub>Cl<sub>2</sub>, 400 MHz) of the H/D exchange in (Me)<sub>2</sub>DSiPhSiD(Me)<sub>2</sub> (Si-7). (# denotes residual CH<sub>2</sub>Cl<sub>2</sub> from the deuterated solvent).

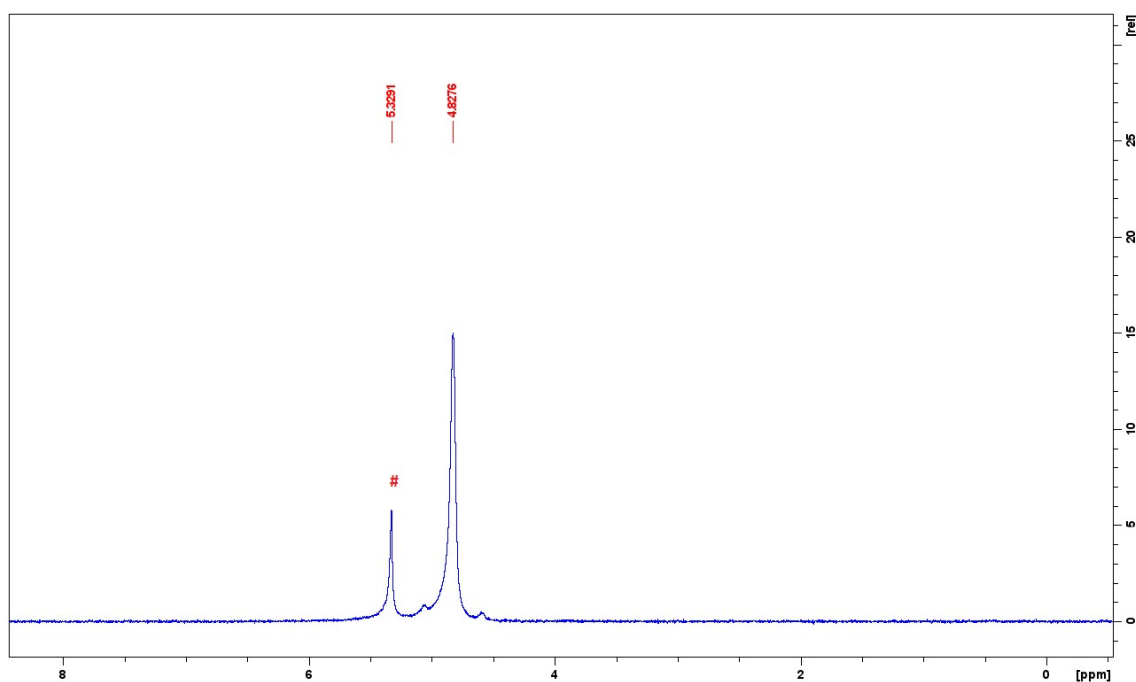

**Figure S18.** <sup>2</sup>H NMR spectrum (CH<sub>2</sub>Cl<sub>2</sub>, 60 MHz) of the H/D exchange in (Me)<sub>2</sub>DSiPhSiD(Me)<sub>2</sub> (Si-7). (# denotes CD<sub>2</sub>Cl<sub>2</sub> used as reference).

### (EtO)<sub>3</sub>SiD (Si-8)

Deuterium incorporation: >99%. Spectroscopic data for this product agree to those previously reported in the literature.<sup>11</sup>

<sup>1</sup>H NMR (400 MHz, CD<sub>2</sub>Cl<sub>2</sub>): δ 3.85 (q, <sup>3</sup>J<sub>HH</sub> = 7.0 Hz, 6H, 3 CH<sub>2</sub>), 1.23 (t, <sup>3</sup>J<sub>HH</sub> = 7.0 Hz, 9H, 3 CH<sub>3</sub>).

<sup>2</sup>H NMR (60 MHz, CH<sub>2</sub>Cl<sub>2</sub>): δ 4.28 (SiD).

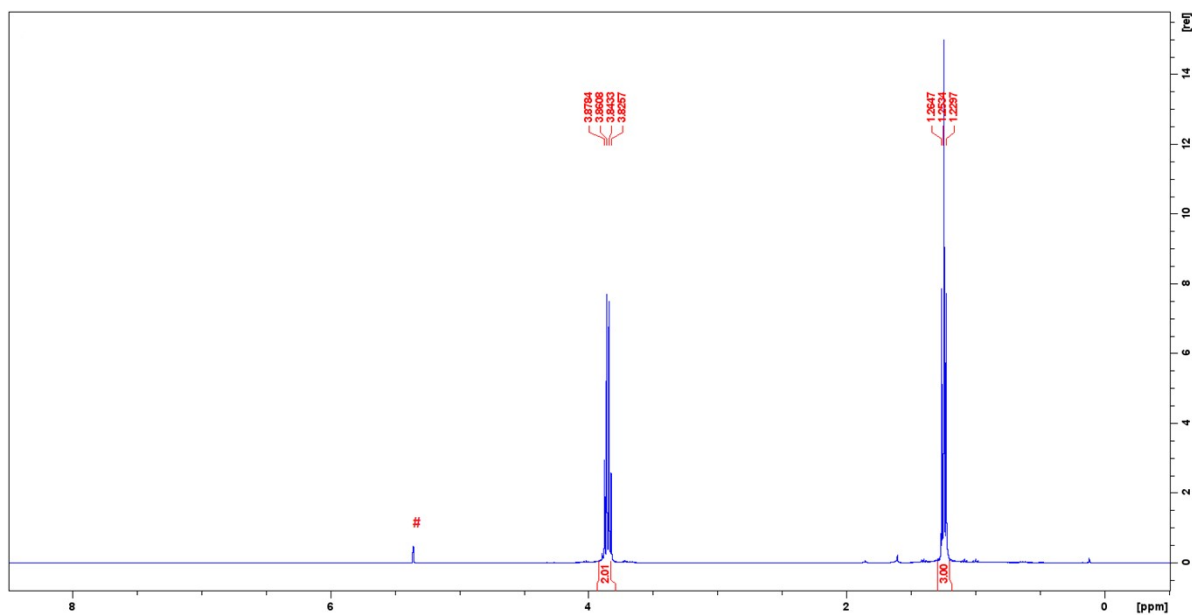

**Figure S19.** <sup>1</sup>H NMR spectrum (CD<sub>2</sub>Cl<sub>2</sub>, 400 MHz) of the H/D exchange in (EtO)<sub>3</sub>SiH (Si-8). (# denotes residual CH<sub>2</sub>Cl<sub>2</sub> from the deuterated solvent).

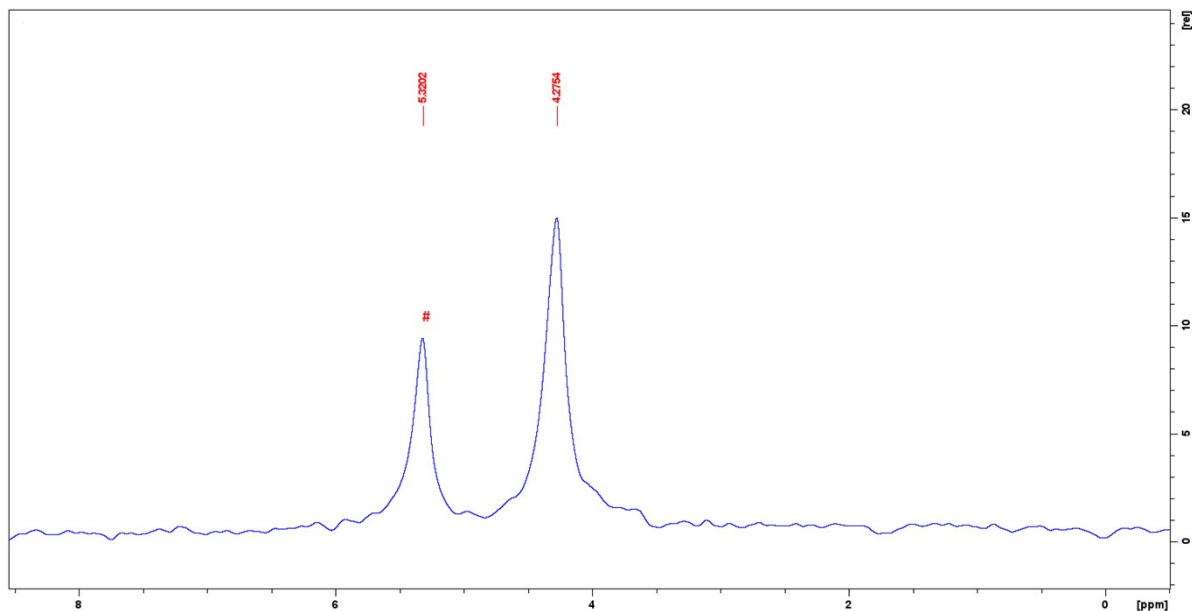

**Figure S20.** <sup>2</sup>H NMR spectrum (CH<sub>2</sub>Cl<sub>2</sub>, 60 MHz) of the H/D exchange in (EtO)<sub>3</sub>SiH (Si-8). (# denotes CD<sub>2</sub>Cl<sub>2</sub> used as reference).

### CIMe<sub>2</sub>SiD (Si-9)

Deuterium incorporation: 73%. Spectroscopic data for this product agree to those previously reported in the literature.<sup>11</sup>

<sup>1</sup>H NMR (400 MHz, THF-*d*<sub>8</sub>): δ 4.87 (hept, <sup>3</sup>J<sub>HH</sub> = 3.2 Hz, SiH), 0.52 (s, 6H, 2 CH<sub>3</sub>).

<sup>2</sup>H NMR (60 MHz, THF-*d*<sub>8</sub>): δ 4.88 (SiD).

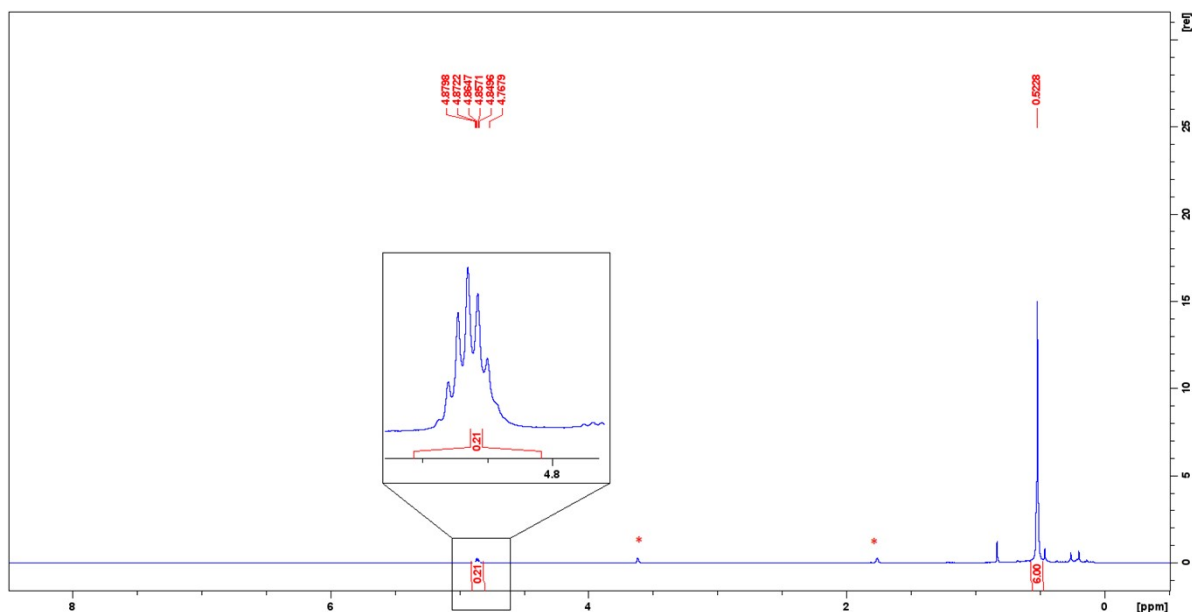

**Figure S21.** <sup>1</sup>H NMR spectrum (THF-*d*<sub>8</sub>, 400 MHz) of the H/D exchange in CIMe<sub>2</sub>SiH (Si-9). (\* denotes residual THF from the deuterated solvent)

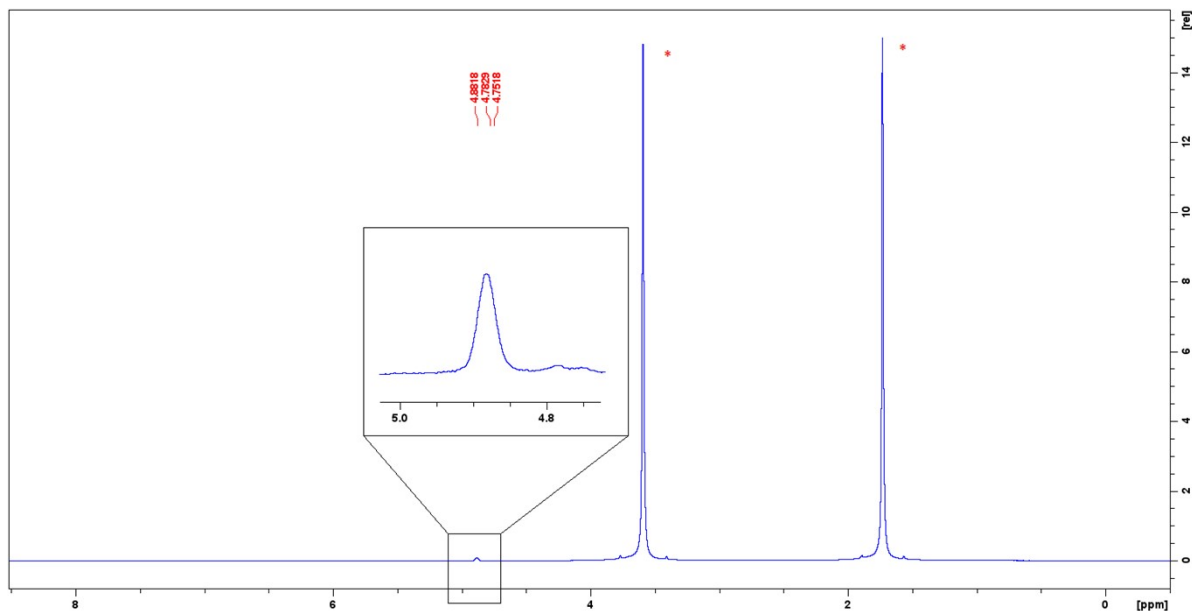

**Figure S22.** <sup>2</sup>H NMR spectrum (THF-*d*<sub>8</sub>, 60 MHz) of the H/D exchange in CIMe<sub>2</sub>SiH (Si-9).

### Ph<sub>2</sub>SiD<sub>2</sub> (Si-10)



Deuterium incorporation: 72%. Spectroscopic data for this product agree to those previously reported in the literature.<sup>12</sup>

<sup>1</sup>H NMR (400 MHz, CD<sub>2</sub>Cl<sub>2</sub>): δ 7.69-7.66 (m, 4H, 4 H arom), 7.49-7.42 (m, 6H, 6 H arom), 4.99 (SiH<sub>2</sub>).

<sup>2</sup>H NMR (60 MHz, CH<sub>2</sub>Cl<sub>2</sub>): δ 5.11 (SiD<sub>2</sub>).

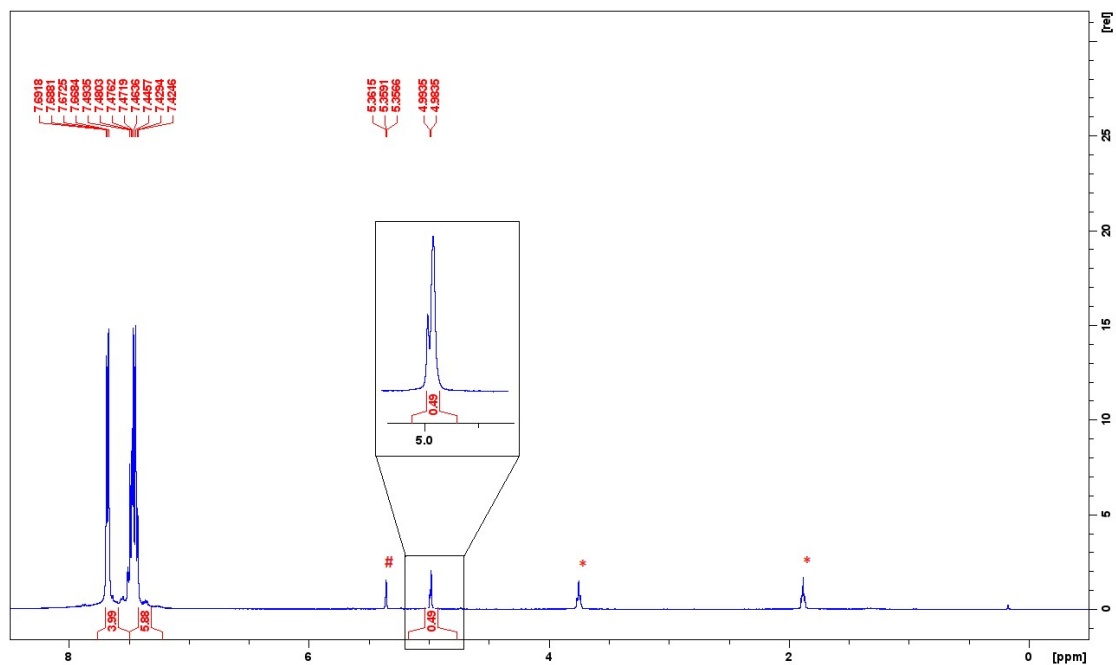

**Figure S23.** <sup>1</sup>H NMR spectrum (CD<sub>2</sub>Cl<sub>2</sub>, 400 MHz) of the H/D exchange in Ph<sub>2</sub>SiH<sub>2</sub> (Si-10). (# denotes residual CH<sub>2</sub>Cl<sub>2</sub> from the deuterated solvent).

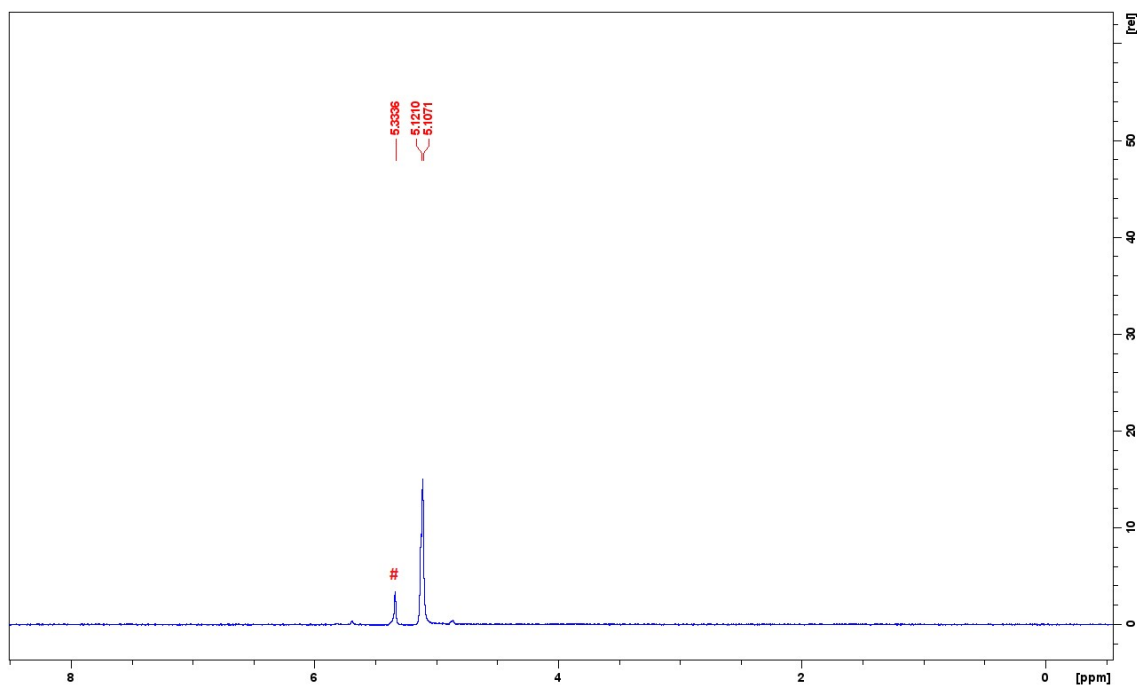

**Figure S24.** <sup>2</sup>H NMR spectrum (CH<sub>2</sub>Cl<sub>2</sub>, 60 MHz) of the H/D exchange in Ph<sub>2</sub>SiH<sub>2</sub> (Si-10). (# denotes CD<sub>2</sub>Cl<sub>2</sub> used as reference).

**PhSiD<sub>3</sub> (Si-11)**

Deuterium incorporation: 42%. Spectroscopic data for this product agree to those previously reported in the literature.<sup>13</sup>

<sup>1</sup>H NMR (400 MHz, CD<sub>2</sub>Cl<sub>2</sub>): δ 7.65-7.40 (m, 2H, 2 H arom), 7.42-7.40 (m, 3H, 3 H arom), 4.23 (SiD<sub>3</sub>).

<sup>2</sup>H NMR (60 MHz, CH<sub>2</sub>Cl<sub>2</sub>): δ 4.31 (s, 3D, SiD<sub>3</sub>).

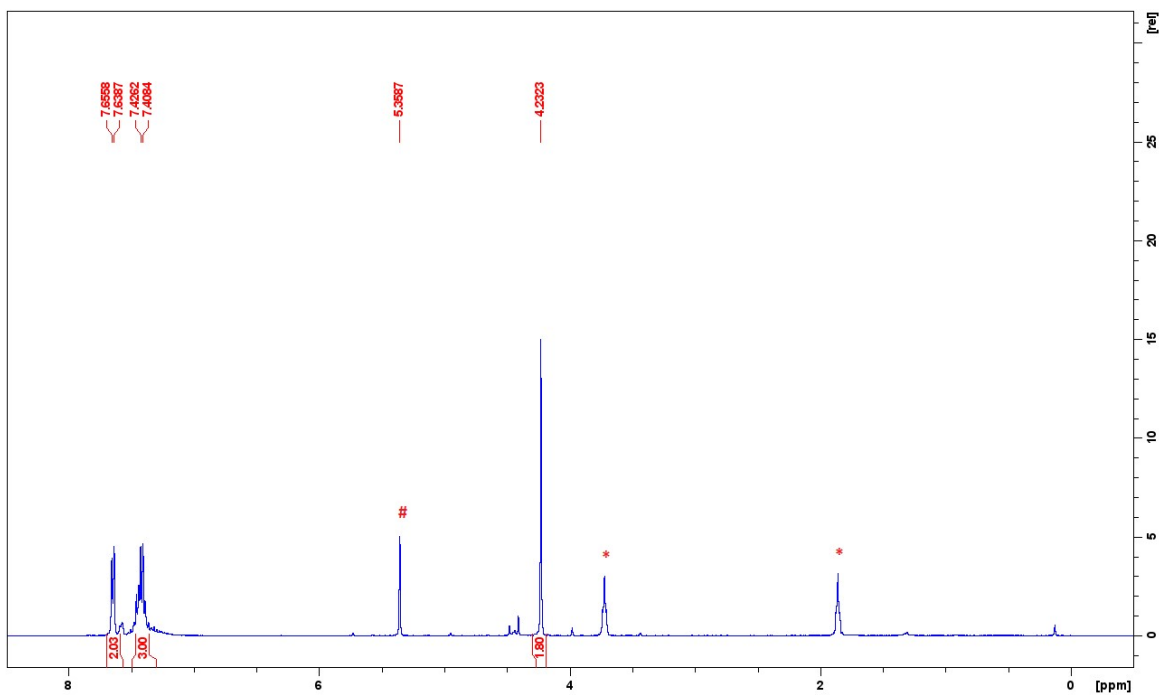

**Figure S25.** <sup>1</sup>H NMR spectrum (CD<sub>2</sub>Cl<sub>2</sub>, 400 MHz) of the H/D exchange in PhSiD<sub>3</sub> (**Si-11**). (# denotes residual CH<sub>2</sub>Cl<sub>2</sub> from the deuterated solvent).

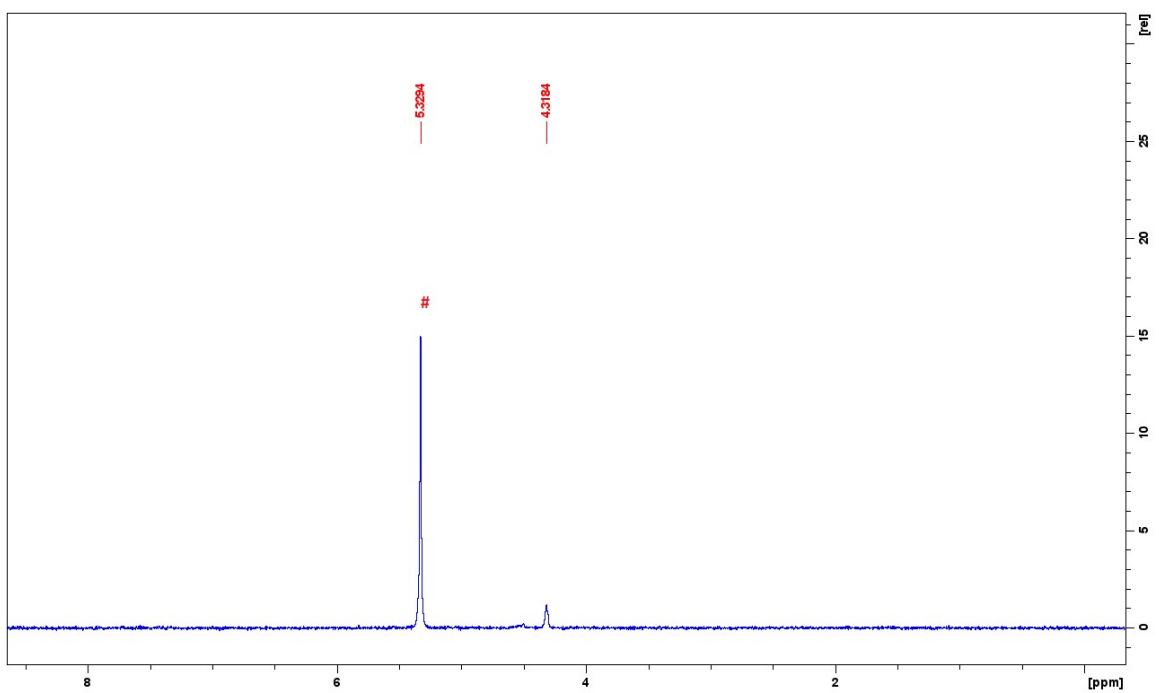

**Figure S26.** <sup>2</sup>H NMR spectrum (CH<sub>2</sub>Cl<sub>2</sub>, 60 MHz) of the H/D exchange in PhSiD<sub>3</sub> (**Si-11**). (# denotes CD<sub>2</sub>Cl<sub>2</sub> used as reference).

**Et<sub>3</sub>GeD (Ge-1)**

Deuterium incorporation: >99%. Spectroscopic data for this product agree to those previously reported in the literature.<sup>13</sup>

<sup>1</sup>H NMR (400 MHz, CD<sub>2</sub>Cl<sub>2</sub>): δ 1.08 (t, <sup>3</sup>J<sub>HH</sub> = 7.6 Hz, 9H, 3 CH<sub>3</sub>), 0.88 (q, <sup>3</sup>J<sub>HH</sub> = 7.6 Hz, 6H, 3 CH<sub>2</sub>).

<sup>2</sup>H NMR (60 MHz, CH<sub>2</sub>Cl<sub>2</sub>): δ 3.75 (GeD).

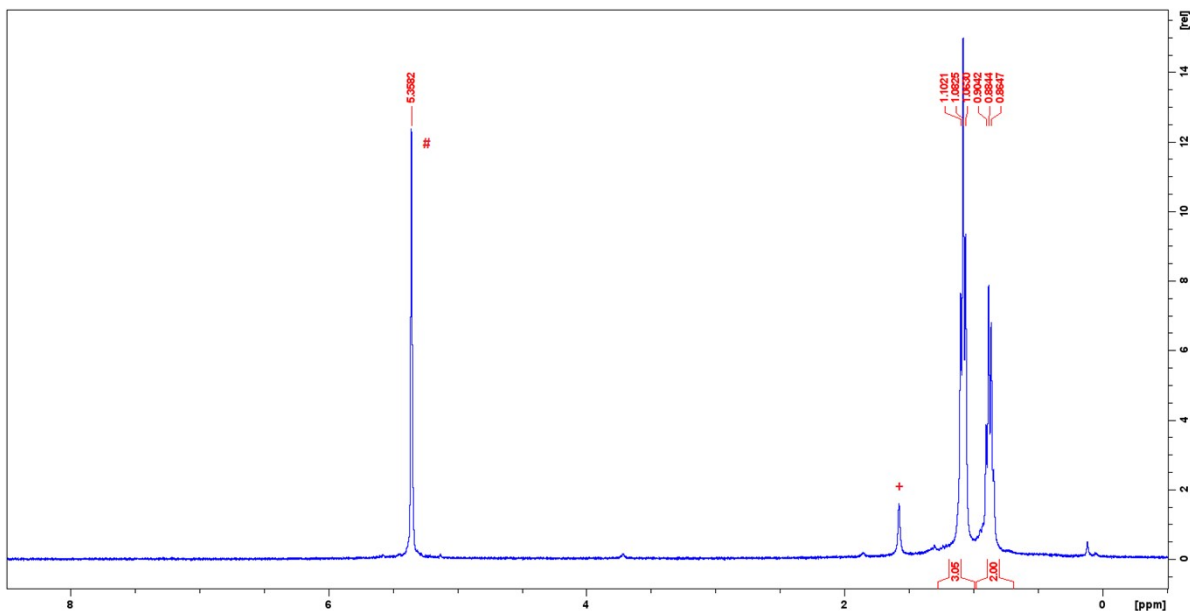

**Figure S27.** <sup>1</sup>H NMR spectrum (CD<sub>2</sub>Cl<sub>2</sub>, 400 MHz) of the H/D exchange in Et<sub>3</sub>GeH (**Ge-1**). (# denotes residual CH<sub>2</sub>Cl<sub>2</sub> from the deuterated solvent, + denotes H<sub>2</sub>O)

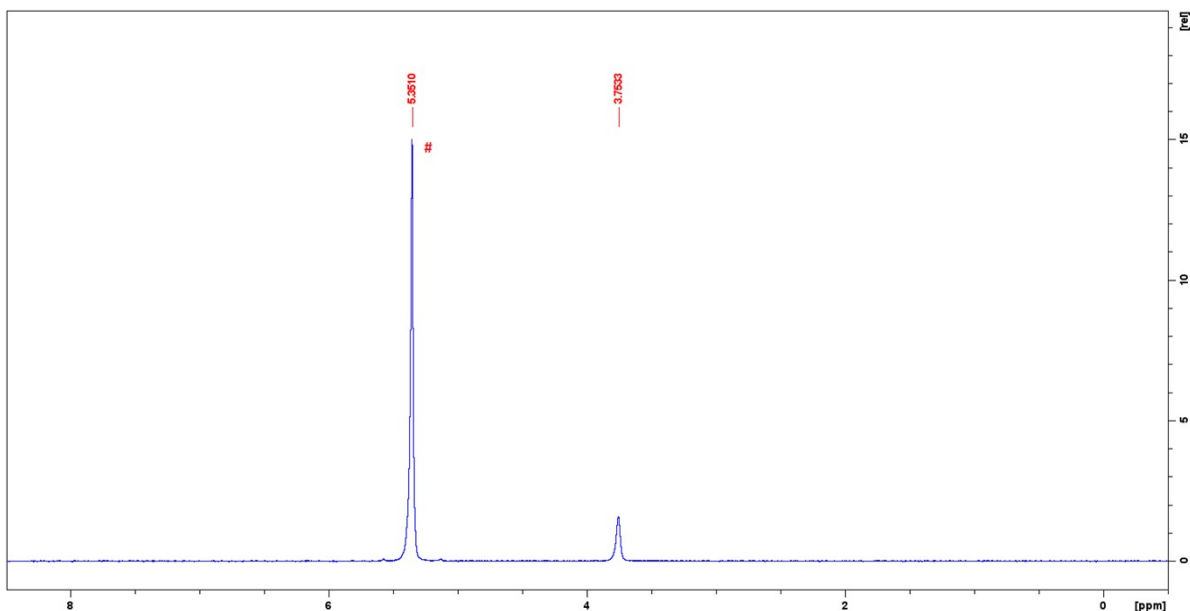

**Figure S28.** <sup>2</sup>H NMR spectrum (CH<sub>2</sub>Cl<sub>2</sub>, 60 MHz) of the H/D exchange in Et<sub>3</sub>GeH (**Ge-1**). (# denotes CD<sub>2</sub>Cl<sub>2</sub> used as reference).

Ph<sub>3</sub>GeD (**Ge-2**)

Deuterium incorporation: 70%. Spectroscopic data for this product agree to those previously reported in the literature.<sup>13</sup>

<sup>1</sup>H NMR (400 MHz, CD<sub>2</sub>Cl<sub>2</sub>): δ 7.58 (m, 6H, 6 H arom), 7.43 (m, 9H, H arom), 5.75 (GeH).

<sup>2</sup>H NMR (60 MHz, CH<sub>2</sub>Cl<sub>2</sub>): δ 5.99 (GeD).

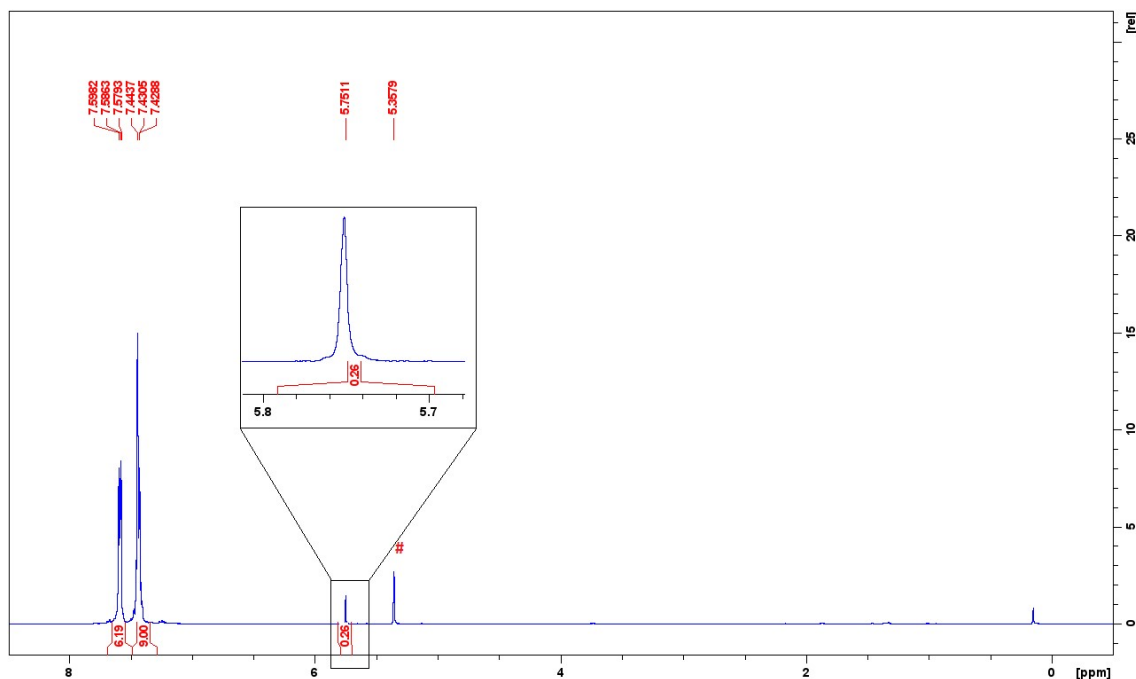

**Figure S29.** <sup>1</sup>H NMR spectrum (CD<sub>2</sub>Cl<sub>2</sub>, 400 MHz) of the H/D exchange in Ph<sub>3</sub>GeD (**Ge-2**). (# denotes residual CH<sub>2</sub>Cl<sub>2</sub> from the deuterated solvent).

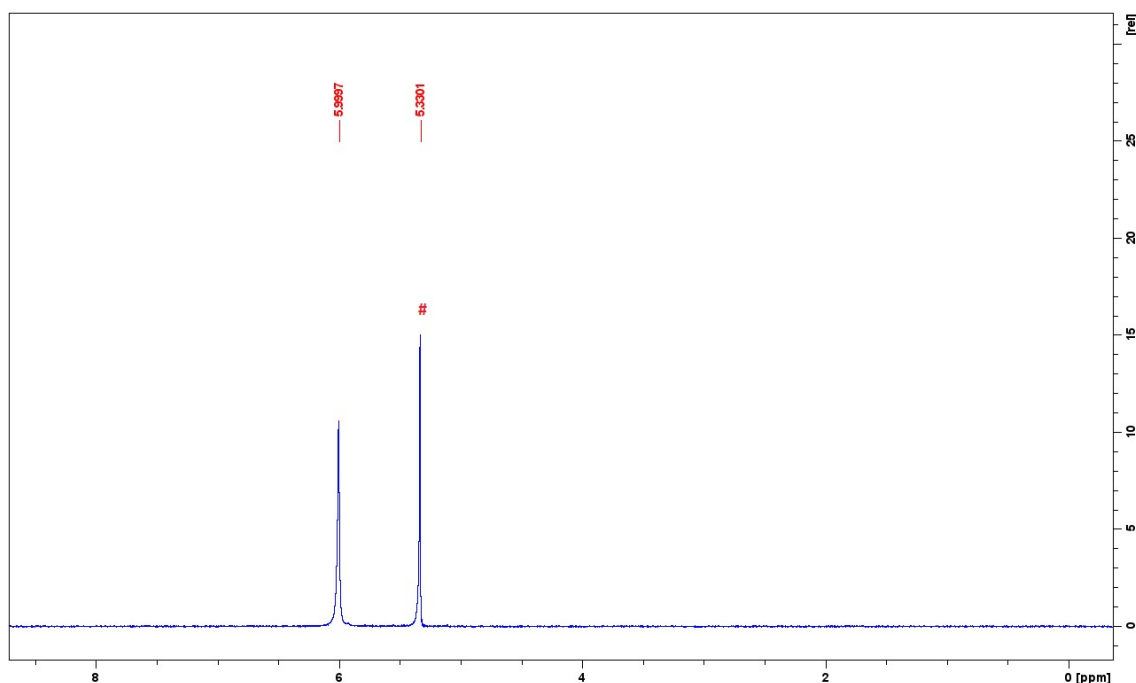

**Figure S30.** <sup>2</sup>H NMR spectrum (CH<sub>2</sub>Cl<sub>2</sub>, 60 MHz) of the H/D exchange in Ph<sub>3</sub>GeD (**Ge-2**). (# denotes CD<sub>2</sub>Cl<sub>2</sub> used as reference).

<sup>119</sup>Bu<sub>3</sub>SnD (Sn-1)

Deuterium incorporation: >99%. Spectroscopic data for this product agree to those previously reported in the literature.<sup>14</sup>

<sup>1</sup>H NMR (400 MHz, CD<sub>2</sub>Cl<sub>2</sub>): δ 1.55 (m, 6H, 3 CH<sub>2</sub>), 1.35 (m, 6H, 3 CH<sub>2</sub>), 1.00 (t, <sup>3</sup>J<sub>HH</sub> = 8.3 Hz, 6H, 3 CH<sub>2</sub>), 0.93 (t, <sup>3</sup>J<sub>HH</sub> = 7.5 Hz, 9H, 3 CH<sub>3</sub>).

<sup>2</sup>H NMR (60 MHz, CH<sub>2</sub>Cl<sub>2</sub>): δ 4.84 (SnD).

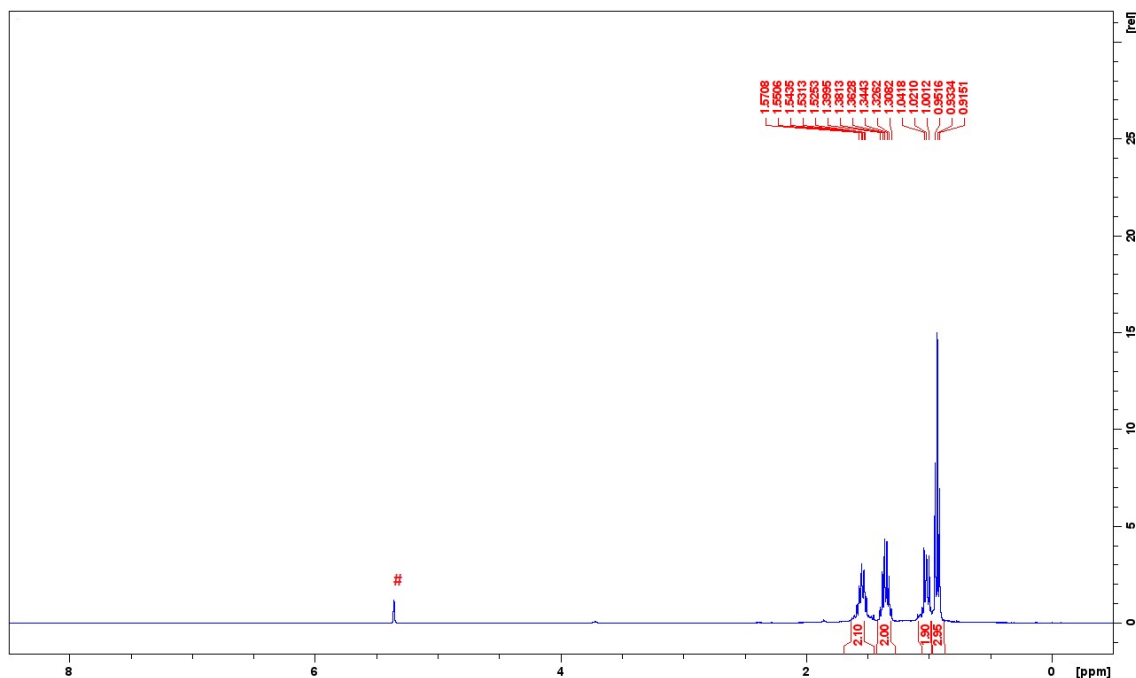

**Figure S31.** <sup>1</sup>H NMR spectrum (CD<sub>2</sub>Cl<sub>2</sub>, 400 MHz) of the H/D exchange in <sup>n</sup>Bu)SnD (**Sn-1**). (# denotes residual CH<sub>2</sub>Cl<sub>2</sub> from the deuterated solvent).

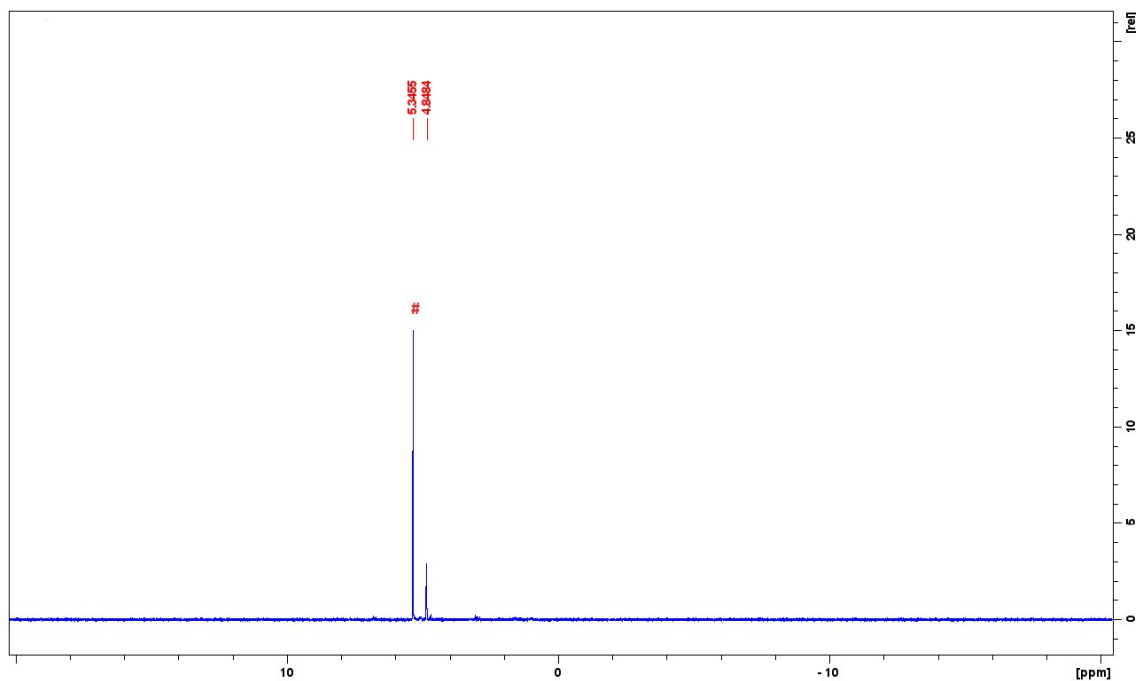

**Figure S32.** <sup>2</sup>H NMR spectrum (CH<sub>2</sub>Cl<sub>2</sub>, 60 MHz) of the H/D exchange in <sup>n</sup>Bu<sub>3</sub>SnD (**Sn-1**). (# denotes CD<sub>2</sub>Cl<sub>2</sub> used as reference).

pinBD (**B-1**)

Deuterium incorporation: >99%. Spectroscopic data for this product agree to those previously reported in the literature.<sup>13</sup>

<sup>1</sup>H NMR (400 MHz, C<sub>6</sub>D<sub>6</sub>): δ 1.02 (s, 12H, 4 CH<sub>3</sub>).

<sup>2</sup>H NMR (60 MHz, C<sub>6</sub>D<sub>6</sub>): δ 4.11 (m, BD).

<sup>11</sup>B NMR (128 MHz, C<sub>6</sub>D<sub>6</sub>): δ 28.5 (t, J<sub>BD</sub> = 20 Hz, BD).

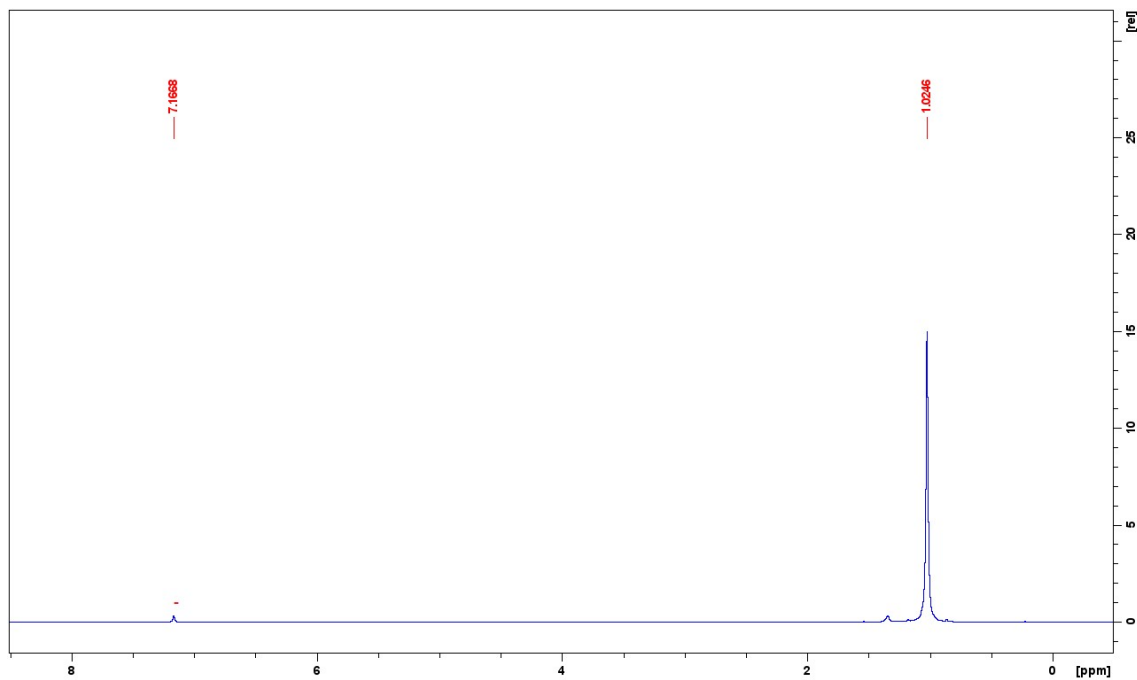

**Figure S33.** <sup>1</sup>H NMR spectrum (C<sub>6</sub>D<sub>6</sub>, 400 MHz) of the H/D exchange in pinBD (**B-1**).

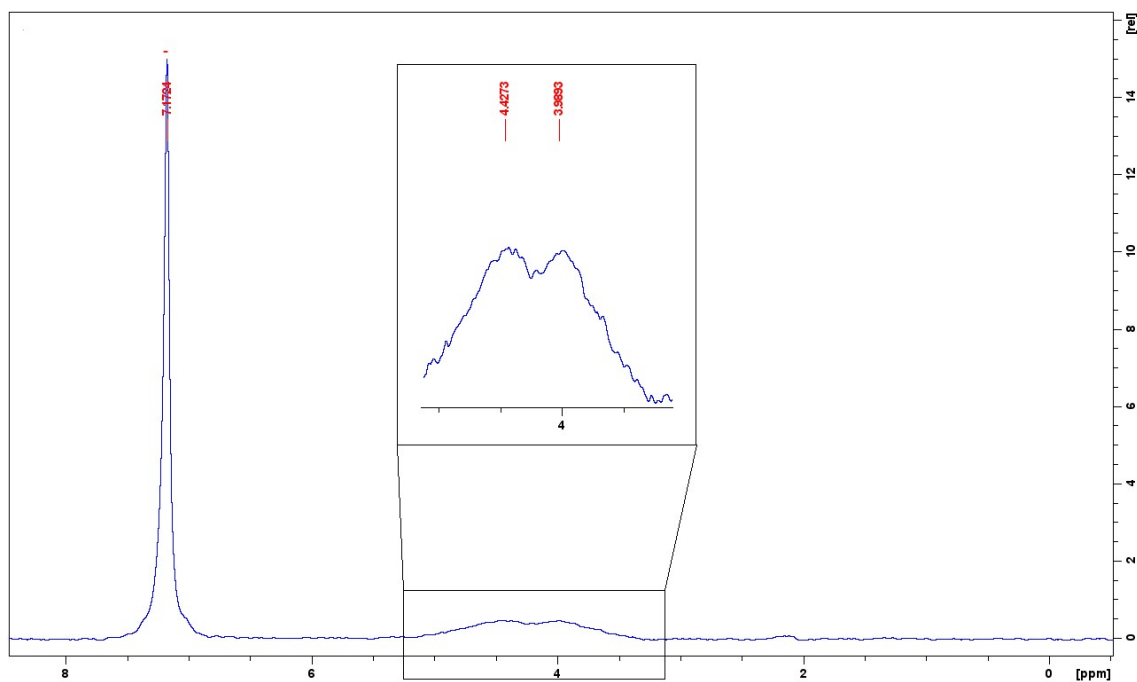

**Figure S34.** <sup>2</sup>H NMR spectrum (C<sub>6</sub>D<sub>6</sub>, 60 MHz) of the H/D exchange in pinBD (**B-1**). (- denotes C<sub>6</sub>D<sub>6</sub>).

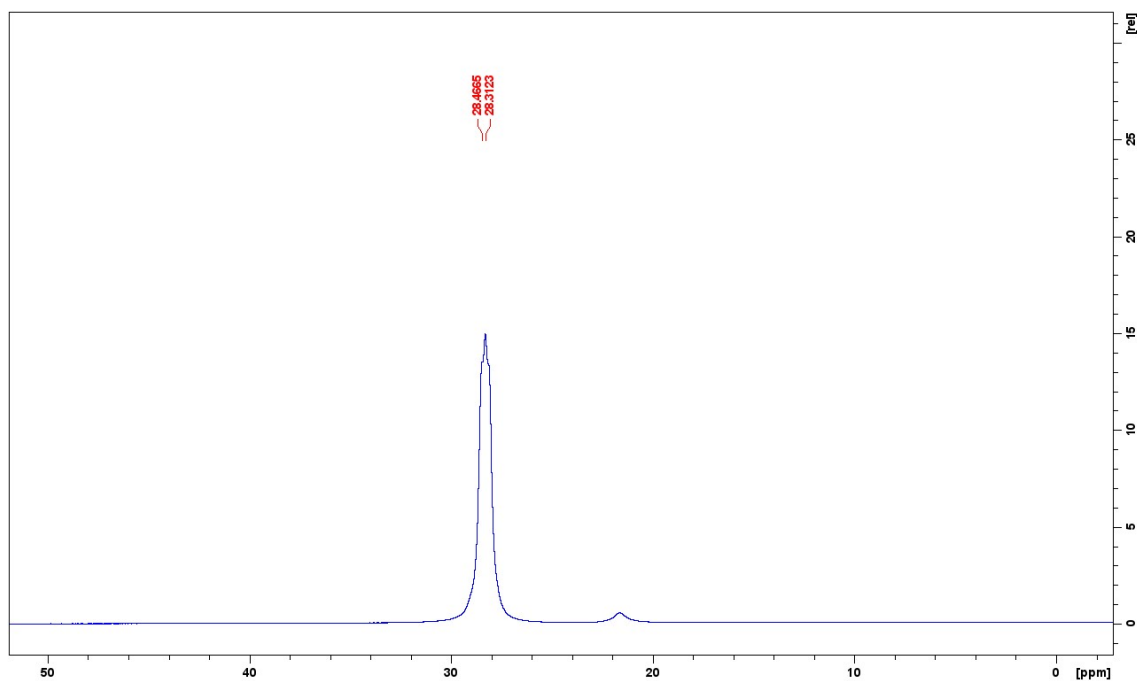

**Figure S35.**  $^{11}\text{B}$  NMR spectrum ( $\text{C}_6\text{D}_6$ , 128 MHz) of the H/D exchange in pinBD (**B-1**).

### catBD (**B-2**)

Deuterium incorporation: >99%. Spectroscopic data for this product agree to those previously reported in the literature.<sup>13</sup>

$^1\text{H}$  NMR (400 MHz,  $\text{C}_6\text{D}_6$ ):  $\delta$  6.96 (m, 2H, 2 H arom), 6.76 (m, 2 H arom)

$^2\text{H}$  NMR (60 MHz,  $\text{C}_6\text{D}_6$ ):  $\delta$  4.72 (m, BD).

$^{11}\text{B}$  NMR (128 MHz,  $\text{C}_6\text{D}_6$ ):  $\delta$  28.7 (t,  $J_{\text{BD}} = 159$  Hz, BD).

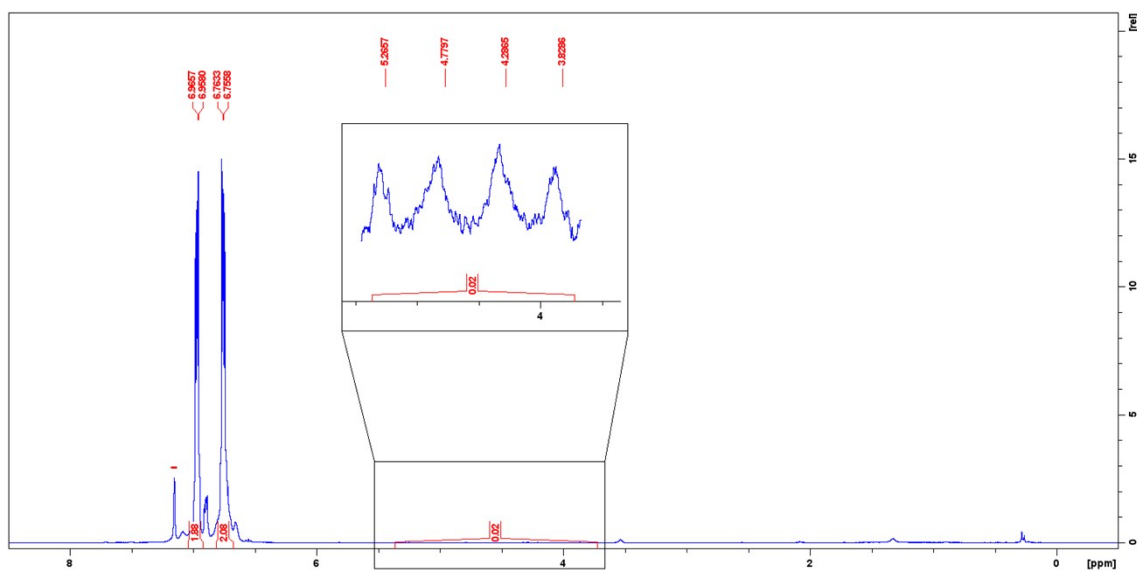

**Figure S36.**  $^1\text{H}$  NMR spectrum ( $\text{C}_6\text{D}_6$ , 400 MHz) of the H/D exchange in catBD (**B-2**).

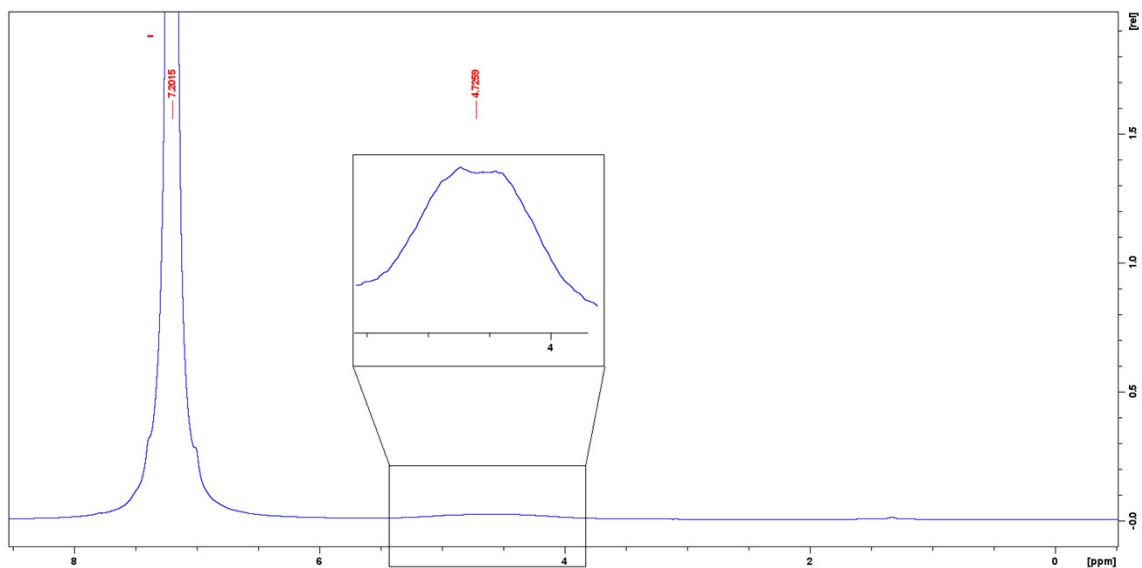

**Figure S37.**  $^2\text{H}$  NMR spectrum ( $\text{C}_6\text{D}_6$ , 60 MHz) of the H/D exchange in catBD (B-2).

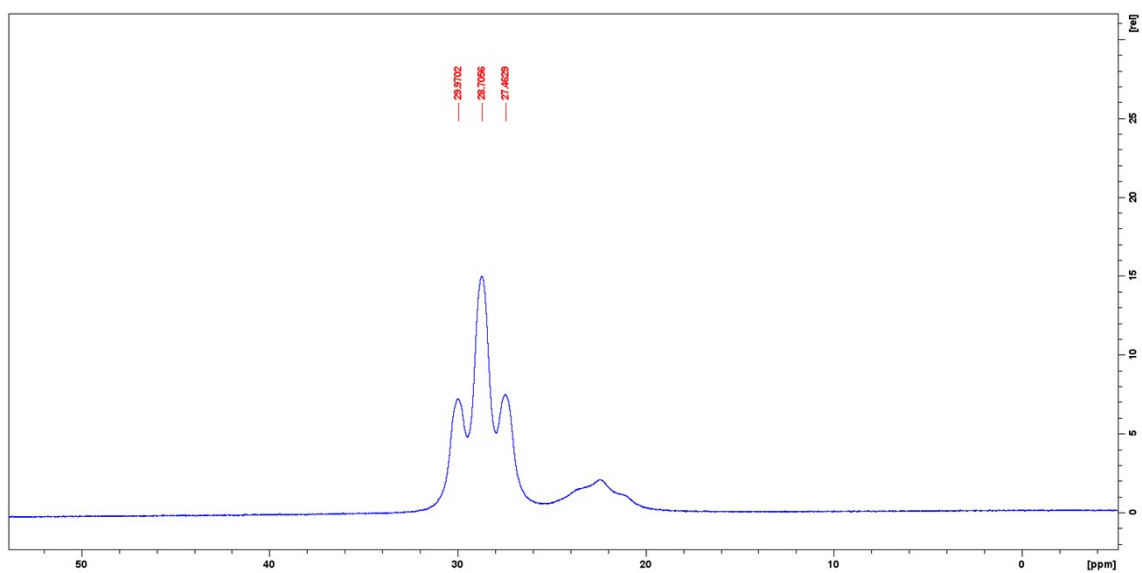

**Figure S38.**  $^{11}\text{B}$  NMR spectrum ( $\text{C}_6\text{D}_6$ , 128 MHz) of the H/D exchange in catBD (B-2).



## S6. References.

- <sup>1</sup> J. T. Fletcher, M. E. Keeney and S. E. Walz, *Synthesis*, 2010, **19**, 3339-3345.
- <sup>2</sup> M. L. Gower and J. D. Crowley, *Dalton Trans.*, 2010, **39**, 2371-2378.
- <sup>3</sup> K. J. Kilpin, U. Paul, L. Ai-Lan and J. Crowley, *Chem. Commun*, 2011, **47**, 328-330.
- <sup>4</sup> S. S. Khan, S. Hanelt and J. Liebscher, *Arkivoc*, 2009, **12**, 193-208.
- <sup>5</sup> M. Wissing and A. Studer, *Chem. Eur. J.*, 2019, **25**, 5870-5874.
- <sup>6</sup> L. Greb, S. Tamke and J. Paradies, *Chem. Commun*, 2014, **50**, 2318-2320.
- <sup>7</sup> S. Zhang, H. Fallah, E. J. Gardner, S. Subrata, J. A. Bertke and T. Cundari, *Angew. Chem. Int. Ed.*, 2016, **54**, 9927-9931.
- <sup>8</sup> T. Komuro, T. Osawa, R. Suzuki, D. Mochizuki, H. Higashi and H. Tobita, *Chem. Commun.*, 2019, **55**, 957-960.
- <sup>9</sup> M. Mato and A. Echavarren, *Angew. Chem. Int. Ed.*, 2019, **58**, 2088-2092.
- <sup>10</sup> J. Campos, A. Esqueda, J. López-Serrano, L. Sánchez, F. P. Cossio, A. de Cozar, E. Álvarez, C. Maya and E. Carmona, *J. Am. Chem. Soc.*, 2010, **47**, 16765-16767.
- <sup>11</sup> K. Smart, E. Mothes-Martin, T. Annaka and M. Grellier, *Adv. Synth. Catal.*, 2014, **354**, 759-764.
- <sup>12</sup> N. Gandhamsetty, S. Park and S. Chang, *J. Am. Chem. Soc.*, 2015, **48**, 15176-15184.
- <sup>13</sup> M. Esteruelas, A. Martínez, M. Oliván and A. Vélez, *J. Org. Chem.*, 2020, **85**, 15693-15698.
- <sup>14</sup> Y. Lu and S. Yamago, *Angew. Chem. Int. Ed.*, 2019, **58**, 3952-3956.
